# Supplementary material
Source: PubMed Central journal article supplement (PMC4191604)
Supplement: jm5009902_si_001.pdf [file jm5009902_si_001.pdf]

## Supporting Information

# Identification of the first inhibitor of the GBP1:PIM1 interaction. Implications for the development of a new class of anticancer agents against paclitaxel resistant cancer cells.

*Mirko Andreoli,<sup>†,//</sup> Marco Persico,<sup>‡,//</sup> Ajay Kumar,<sup>±,//</sup> Nausicaa Orteca,<sup>‡</sup> Vineet Kumar,<sup>#</sup> Antonella Pepe,<sup>#</sup> Sakkarapalayam Mahalingam,<sup>§</sup> Antonio E. Alegria,<sup>€</sup> Lella Petrella,<sup>§</sup> Laima Sevcunaite,<sup>§</sup> Alessia Camperchioli,<sup>§</sup> Marisa Mariani,<sup>†</sup> Antonio Di Dato,<sup>‡</sup> Ettore Novellino,<sup>‡</sup> Giovanni Scambia,<sup>¥</sup> Sanjay V. Malhotra,<sup>\*,#</sup> Cristiano Ferlini,<sup>\*,†</sup> Caterina Fattorusso<sup>\*,‡</sup>*

### TOC:

- a) **Figure 1SI.** Dot chart showing the sensitivity to paclitaxel in the NCI-60 panel;
- b) **Figure 2SI-5SI.** Five dose data on the NCI-60 panel for NSC756090, NSC756092, NSC756093 and NSC756095;
- c) **Figure 6SI.** Heat-Map showing the results of two-way hierarchical clustering of the COMPARE analysis for the most active twenty-one 4-APTs with the reference mechanistic set;
- d) **Figure 7SI.** Biosensograms for controls of binding specificity for the interaction GBP1:PIM1;
- e) **Figure 8SI.** Biosensograms for the negative controls of binding of GBP1 and for the absence of binding of NSC756093 to PIM1 as ligand;
- f) **Figure 9SI.** X-ray structure of the human TopoII $\beta$ /DNA complex stabilized by the anticancer drug etoposide (PDB ID: 3QX3);
- g) **Figure 10SI.** X-ray structure of the human tubulin/podophyllotoxin complex (PDB ID: 1SA1);
- h) **Figure 11SI.** Molecular model of NSC756093/GBP1 complex;
- i) **Figure 12SI.** Superimposition of NSC756095, NSC756094, NSC756100 and NSC756108 PM7 conformers on the bioactive conformation of NSC756093;
- j) **Figure 13SI.** Mutated residues in GBP1 structure;
- k) **Table 1SI.** Energy values of the NSC756093/GBP1 complexes obtained by docking studies;

- l) **Table 2SI.** Protein functional motifs indentified by the ELM software in the binding sites of etoposide, podophyllotoxin and NSC756093;
- m) Ramachandran plots, Chi1-Chi2 plots, Main Chain parameters, Side Chain parameters of:
  - i) Human GBP1 X-ray structure (PDB ID: 1DG3);
  - ii) Structure of NSC756093/GBP1 docked complex.

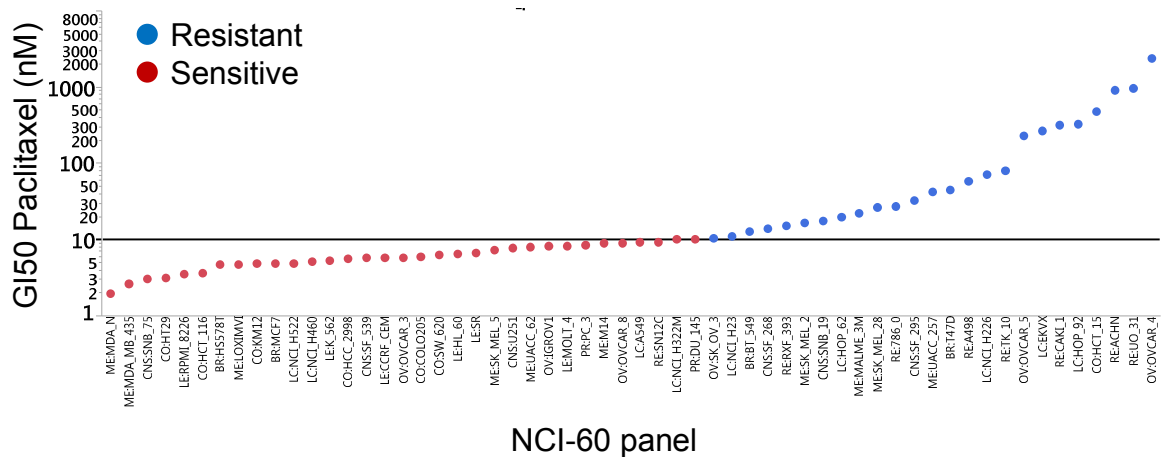

**Figure 1SI.** Dot chart showing the sensitivity to paclitaxel in the NCI-60 panel. Cells were grouped as sensitive (red dot) or resistant (blue dot) if the GI<sub>50</sub> value was lower or higher than 10 nM, respectively. As reported in the chart paclitaxel-resistant cell lines are the following: SK-OV-3, NCI-H23, BT-549, SF-268, RXF-393, SK-MEL-2, SNB-19, HOP-62, MALME-3M, SK-MEL-28, 786-0, SF-295, UACC-257, T47D, A498, NCI-H226, TK-10, OVACAR-5, EKVX, CAKI-1, HOP-92, HCT-15, ACHN, UO-31, OVCAR-4.

| Parent Cell Line                  | Time Zero | Log10 Concentration    |       |       |       |       |       |                |      |      |      |       |         | OD0       | TO1       | LD50 |
|-----------------------------------|-----------|------------------------|-------|-------|-------|-------|-------|----------------|------|------|------|-------|---------|-----------|-----------|------|
|                                   |           | Mean Optical Densities |       |       |       |       |       | Percent Growth |      |      |      |       |         |           |           |      |
|                                   |           | Ctrl                   | -6.3  | -7.3  | -8.3  | -9.3  | -10.3 | -6.3           | -7.3 | -8.3 | -9.3 | -10.3 |         |           |           |      |
| <b>Leukemia</b>                   |           |                        |       |       |       |       |       |                |      |      |      |       |         |           |           |      |
| CCRF-CEM                          | 0.569     | 2.162                  | 2.218 | 0.937 | 0.796 | 0.989 | 0.763 | 103            | 24   | 16   | 19   | 13    | 2.34E-8 | > 5.00E-8 | > 5.00E-8 |      |
| HL-60(TB)                         | 0.931     | 3.195                  | 3.117 | 1.198 | 0.983 | 1.014 | 0.989 | 98             | 12   | 1    | 4    | 3     | 1.81E-8 | > 5.00E-8 | > 5.00E-8 |      |
| K-562                             | 0.626     | 2.714                  | 2.742 | 1.064 | 0.883 | 0.873 | 0.872 | 101            | 21   | 11   | 12   | 12    | 2.18E-8 | > 5.00E-8 | > 5.00E-8 |      |
| MOLT-4                            | 0.595     | 2.243                  | 2.247 | 1.530 | 0.872 | 0.894 | 0.898 | 100            | 57   | 17   | 16   | 16    | 7.56E-8 | > 5.00E-8 | > 5.00E-8 |      |
| RPMI-8226                         | 0.674     | 1.846                  | 1.812 | 0.958 | 0.915 | 0.952 | 0.879 | 117            | 29   | 26   | 30   | 21    | 2.90E-8 | > 5.00E-8 | > 5.00E-8 |      |
| <b>Non-Small Cell Lung Cancer</b> |           |                        |       |       |       |       |       |                |      |      |      |       |         |           |           |      |
| A549ATCC                          | 0.268     | 1.369                  | 1.338 | 0.823 | 0.330 | 0.387 | 0.434 | 37             | 32   | 6    | 11   | 15    | 2.68E-8 | > 5.00E-8 | > 5.00E-8 |      |
| EKVX                              | 0.700     | 1.633                  | 1.667 | 1.130 | 1.188 | 1.226 | 1.117 | 32             | 46   | 52   | 56   | 45    | 5.00E-8 | > 5.00E-8 | > 5.00E-8 |      |
| HOP-62                            | 0.265     | 0.796                  | 0.820 | 0.439 | 0.368 | 0.381 | 0.374 | 107            | 20   | 23   | 22   | 21    | 2.60E-8 | > 5.00E-8 | > 5.00E-8 |      |
| HOP-82                            | 1.076     | 1.434                  | 1.377 | 1.301 | 1.113 | 1.209 | 1.166 | 84             | 82   | 10   | 37   | 22    | 8.61E-8 | > 5.00E-8 | > 5.00E-8 |      |
| HOP-H226                          | 0.542     | 1.136                  | 1.127 | 0.890 | 0.948 | 0.949 | 0.957 | 99             | 25   | 1    | 1    | 2     | 2.28E-8 | > 5.00E-8 | > 5.00E-8 |      |
| HOP-H23                           | 0.566     | 1.626                  | 1.500 | 0.993 | 0.708 | 0.762 | 0.739 | 37             | 31   | 16   | 20   | 16    | 7.56E-8 | > 5.00E-8 | > 5.00E-8 |      |
| HOP-H322M                         | 0.670     | 1.636                  | 1.612 | 1.261 | 1.037 | 1.098 | 1.038 | 93             | 44   | 33   | 41   | 39    | 3.69E-8 | > 5.00E-8 | > 5.00E-8 |      |
| HOP-H460                          | 0.230     | 2.289                  | 2.429 | 0.353 | 0.341 | 0.316 | 0.331 | 107            | 8    | 6    | 4    | 5     | 1.88E-8 | > 5.00E-8 | > 5.00E-8 |      |
| HOP-H522                          | 0.628     | 1.534                  | 1.479 | 0.531 | 0.528 | 0.561 | 0.507 | 92             | -36  | -36  | -30  | -39   | 1.07E-8 | > 5.00E-8 | > 5.00E-8 |      |
| <b>Colon Cancer</b>               |           |                        |       |       |       |       |       |                |      |      |      |       |         |           |           |      |
| COLO 205                          | 0.183     | 0.893                  | 0.906 | 0.174 | 0.088 | 0.062 | 0.046 | 108            | -10  | -66  | -68  | -76   | 1.56E-8 | 4.11E-8   | 2.56E-7   |      |
| HCC-2998                          | 0.671     | 2.190                  | 2.075 | 1.291 | 0.999 | 0.932 | 0.936 | 92             | 40   | -11  | 1    | 2     | 3.24E-8 | > 5.00E-8 | > 5.00E-8 |      |
| HCT-116                           | 0.201     | 1.508                  | 1.574 | 0.330 | 0.296 | 0.267 | 0.288 | 106            | 10   | 7    | 4    | 6     | 1.89E-8 | > 5.00E-8 | > 5.00E-8 |      |
| HCT-15                            | 0.347     | 2.641                  | 2.448 | 1.561 | 0.981 | 0.838 | 0.822 | 96             | 96   | 11   | 13   | 16    | 6.87E-8 | > 5.00E-8 | > 5.00E-8 |      |
| HT29                              | 0.196     | 1.020                  | 1.041 | 0.191 | 0.179 | 0.186 | 0.191 | 103            | -2   | -9   | -4   | -2    | 1.69E-8 | 4.75E-8   | 5.00E-8   |      |
| HM12                              | 0.266     | 1.903                  | 1.906 | 0.532 | 0.416 | 0.407 | 0.461 | 100            | 11   | 4    | 3    | 7     | 1.84E-8 | > 5.00E-8 | > 5.00E-8 |      |
| SW-620                            | 0.196     | 1.103                  | 1.118 | 0.303 | 0.416 | 0.388 | 0.393 | 93             | 30   | 22   | 20   | 20    | 1.96E-8 | > 5.00E-8 | > 5.00E-8 |      |
| <b>CNS Cancer</b>                 |           |                        |       |       |       |       |       |                |      |      |      |       |         |           |           |      |
| SF-266                            | 0.364     | 1.217                  | 1.230 | 0.696 | 0.519 | 0.521 | 0.493 | 101            | 35   | 18   | 18   | 10    | 3.00E-8 | > 5.00E-8 | > 5.00E-8 |      |
| SF-295                            | 0.792     | 2.219                  | 2.079 | 0.796 | 0.623 | 0.679 | 0.693 | 90             | 1    | 2    | 6    | 7     | 1.40E-8 | > 5.00E-8 | > 5.00E-8 |      |
| SF-639                            | 0.694     | 2.196                  | 2.312 | 0.872 | 0.961 | 0.917 | 0.872 | 109            | 10   | 7    | 5    | 9     | 1.79E-8 | > 5.00E-8 | > 5.00E-8 |      |
| SNB-19                            | 0.529     | 1.620                  | 1.521 | 0.918 | 0.646 | 0.694 | 0.644 | 98             | 33   | 32   | 37   | 32    | 3.29E-8 | > 5.00E-8 | > 5.00E-8 |      |
| SNB-75                            | 0.598     | 1.291                  | 1.236 | 0.798 | 0.646 | 0.698 | 0.676 | 92             | 27   | 36   | 37   | 40    | 2.24E-8 | > 5.00E-8 | > 5.00E-8 |      |
| U251                              | 0.309     | 1.607                  | 1.523 | 0.468 | 0.442 | 0.467 | 0.470 | 94             | 11   | 10   | 12   | 12    | 1.70E-8 | > 5.00E-8 | > 5.00E-8 |      |
| <b>Melanoma</b>                   |           |                        |       |       |       |       |       |                |      |      |      |       |         |           |           |      |
| LOX IMVi                          | 0.426     | 2.238                  | 2.096 | 1.038 | 0.740 | 0.803 | 0.761 | 92             | 34   | 17   | 21   | 20    | 2.64E-8 | > 5.00E-8 | > 5.00E-8 |      |
| MALME-3M                          | 0.670     | 1.643                  | 1.574 | 1.024 | 0.292 | 0.393 | 1.126 | 93             | 36   | 39   | 42   | 47    | 2.97E-8 | > 5.00E-8 | > 5.00E-8 |      |
| M16                               | 0.436     | 1.423                  | 1.441 | 0.933 | 0.493 | 0.470 | 0.539 | 103            | 19   | 9    | 6    | 13    | 2.13E-8 | > 5.00E-8 | > 5.00E-8 |      |
| MDA-MB-435                        | 0.477     | 1.971                  | 1.945 | 0.290 | 0.292 | 0.306 | 0.294 | 92             | -48  | -39  | -36  | -38   | 9.04E-9 | 2.27E-8   | > 5.00E-8 |      |
| SK-MEL-2                          | 0.948     | 1.897                  | 1.730 | 1.067 | 0.936 | 0.992 | 0.933 | 104            | 15   | -1   | 6    | -2    | 2.02E-8 | > 5.00E-8 | > 5.00E-8 |      |
| SK-MEL-29                         | 0.430     | 1.343                  | 1.321 | 0.746 | 0.696 | 0.630 | 0.696 | 98             | 36   | 51   | 54   | 51    | 5.00E-8 | > 5.00E-8 | > 5.00E-8 |      |
| SK-MEL-5                          | 0.447     | 1.318                  | 1.330 | 0.441 | 0.341 | 0.340 | 0.317 | 101            | -1   | -24  | -24  | -29   | 1.66E-8 | 4.86E-8   | > 5.00E-8 |      |
| UACC-267                          | 0.693     | 1.244                  | 1.221 | 0.908 | 0.693 | 0.802 | 0.939 | 96             | 42   | 40   | 41   | 47    | 3.57E-8 | > 5.00E-8 | > 5.00E-8 |      |
| UACC-62                           | 0.711     | 2.196                  | 2.109 | 1.014 | 1.175 | 1.168 | 1.088 | 97             | 21   | 32   | 32   | 28    | 2.07E-8 | > 5.00E-8 | > 5.00E-8 |      |
| <b>Ovarian Cancer</b>             |           |                        |       |       |       |       |       |                |      |      |      |       |         |           |           |      |
| IGROV1                            | 0.662     | 1.771                  | 1.622 | 1.114 | 0.913 | 0.967 | 0.922 | 104            | 48   | 38   | 32   | 29    | 4.07E-8 | > 5.00E-8 | > 5.00E-8 |      |
| OVCA9-3                           | 0.461     | 1.394                  | 1.446 | 0.377 | 0.363 | 0.343 | 0.364 | 106            | -16  | -22  | -24  | -22   | 1.42E-8 | 3.87E-8   | > 5.00E-8 |      |
| OVCA9-4                           | 0.485     | 1.803                  | 1.467 | 0.896 | 0.702 | 0.626 | 0.717 | 96             | 38   | 31   | 36   | 24    | 3.06E-8 | > 5.00E-8 | > 5.00E-8 |      |
| OVCA9-5                           | 0.483     | 1.326                  | 1.258 | 0.778 | 0.812 | 0.804 | 0.783 | 90             | 34   | 38   | 37   | 36    | 2.57E-8 | > 5.00E-8 | > 5.00E-8 |      |
| OVCA9-8                           | 0.366     | 1.333                  | 1.267 | 0.381 | 0.333 | 0.383 | 0.426 | 92             | 2    | -9   | -1   | 6     | 1.46E-8 | > 5.00E-8 | > 5.00E-8 |      |
| NCIADR-RES                        | 0.573     | 1.667                  | 1.646 | 1.343 | 0.980 | 0.648 | 0.596 | 98             | 70   | 1    | 7    | -3    | 9.75E-8 | 2.46E-8   | > 5.00E-8 |      |
| SK-OV-3                           | 0.390     | 1.086                  | 1.026 | 0.392 | 0.411 | 0.437 | 0.418 | 94             | -2   | 3    | 7    | 4     | 1.43E-8 | > 5.00E-8 | > 5.00E-8 |      |
| <b>Renal Cancer</b>               |           |                        |       |       |       |       |       |                |      |      |      |       |         |           |           |      |
| 786-O                             | 0.531     | 2.070                  | 2.113 | 1.260 | 0.736 | 0.793 | 0.768 | 103            | 47   | 13   | 17   | 16    | 4.48E-8 | > 5.00E-8 | > 5.00E-8 |      |
| A498                              | 1.304     | 2.046                  | 2.001 | 1.308 | 1.226 | 1.267 | 1.223 | 93             | 1    | -6   | -1   | -6    | 1.47E-8 | 6.19E-8   | > 5.00E-8 |      |
| ACHN                              | 0.372     | 1.604                  | 1.751 | 1.016 | 0.798 | 0.754 | 0.757 | 96             | 46   | 29   | 27   | 27    | 3.86E-8 | > 5.00E-8 | > 5.00E-8 |      |
| CAK1-1                            | 0.616     | 2.240                  | 2.140 | 1.646 | 1.371 | 1.414 | 1.402 | 93             | 96   | 39   | 42   | 41    | 1.38E-7 | > 5.00E-8 | > 5.00E-8 |      |
| RUF 303                           | 0.636     | 0.989                  | 0.989 | 0.529 | 0.743 | 0.750 | 0.731 | 97             | -17  | 30   | 34   | 28    | 1.29E-8 | > 5.00E-8 | > 5.00E-8 |      |
| SN12C                             | 0.639     | 1.931                  | 1.919 | 1.269 | 0.952 | 1.038 | 0.961 | 99             | 49   | 36   | 32   | 26    | 4.60E-8 | > 5.00E-8 | > 5.00E-8 |      |
| TK-10                             | 0.668     | 1.197                  | 1.263 | 0.676 | 0.639 | 0.804 | 0.889 | 109            | 90   | 42   | 54   | 48    | 5.00E-8 | > 5.00E-8 | > 5.00E-8 |      |
| UO-31                             | 0.506     | 1.893                  | 1.740 | 1.519 | 0.893 | 0.923 | 0.897 | 91             | 75   | 26   | 31   | 27    | 1.69E-7 | > 5.00E-8 | > 5.00E-8 |      |
| <b>Pancreatic Cancer</b>          |           |                        |       |       |       |       |       |                |      |      |      |       |         |           |           |      |
| PC-3                              | 0.474     | 1.467                  | 1.491 | 0.734 | 0.699 | 0.670 | 0.696 | 102            | 26   | 19   | 20   | 19    | 2.43E-8 | > 5.00E-8 | > 5.00E-8 |      |
| DU-145                            | 0.324     | 1.226                  | 1.262 | 0.676 | 0.270 | 0.238 | 0.266 | 103            | 38   | -17  | -27  | -18   | 2.54E-8 | 2.10E-7   | > 5.00E-8 |      |
| <b>Breast Cancer</b>              |           |                        |       |       |       |       |       |                |      |      |      |       |         |           |           |      |
| MDA-MB-231ATCC                    | 0.471     | 1.061                  | 1.076 | 0.696 | 0.449 | 0.522 | 0.546 | 102            | 33   | -6   | 9    | 12    | 2.84E-8 | > 5.00E-8 | > 5.00E-8 |      |
| HS 5787                           | 0.714     | 1.672                  | 1.683 | 1.050 | 1.166 | 1.166 | 1.096 | 101            | 36   | 47   | 47   | 39    | 2.97E-8 | > 5.00E-8 | > 5.00E-8 |      |
| BT-20                             | 0.752     | 1.893                  | 1.721 | 1.242 | 1.068 | 1.098 | 1.090 | 106            | 64   | 34   | 38   | 37    | 7.69E-8 | > 5.00E-8 | > 5.00E-8 |      |
| T-47D                             | 0.483     | 1.117                  | 1.149 | 0.736 | 0.791 | 0.817 | 0.784 | 106            | 40   | -69  | 53   | 44    | 5.00E-8 | > 5.00E-8 | > 5.00E-8 |      |
| MDA-MB-468                        | 0.629     | 1.403                  | 1.311 | 0.573 | 0.620 | 0.490 | 0.416 | 98             | -9   | -17  | -22  | -34   | 1.23E-8 | 4.06E-8   | > 5.00E-8 |      |

Figure 2SI. Five dose data for NSC756090.

| Panel/Cell Line                   | Time  | Zero  | Ctrl  | Log10 Concentration    |       |       |       |      | Percent Growth |      |      |      |         | GI50      | TGI       | LO50 |
|-----------------------------------|-------|-------|-------|------------------------|-------|-------|-------|------|----------------|------|------|------|---------|-----------|-----------|------|
|                                   |       |       |       | Mean Optical Densities |       |       |       |      |                |      |      |      |         |           |           |      |
|                                   |       |       |       | -8.0                   | -7.0  | -6.0  | -5.0  | -4.0 | -8.0           | -7.0 | -6.0 | -5.0 | -4.0    |           |           |      |
| <b>Leukemia</b>                   |       |       |       |                        |       |       |       |      |                |      |      |      |         |           |           |      |
| CCRF-CEM                          | 0.544 | 2.032 | 2.020 | 1.325                  | 0.696 | 0.668 | 0.712 | 99   | 52             | 10   | 8    | 11   | 1.14E-7 | > 1.00E-4 | > 1.00E-4 |      |
| K562                              | 0.310 | 1.907 | 1.606 | 0.604                  | 0.462 | 0.395 | 0.436 | 97   | 20             | 10   | 5    | 8    | 3.52E-8 | > 1.00E-4 | > 1.00E-4 |      |
| MOLT-4                            | 0.548 | 1.753 | 1.654 | 1.402                  | 0.841 | 0.770 | 0.801 | 93   | 71             | 24   | 18   | 21   | 2.90E-7 | > 1.00E-4 | > 1.00E-4 |      |
| RPMI-8226                         | 0.758 | 2.412 | 2.336 | 1.818                  | 0.945 | 0.916 | 0.949 | 95   | 64             | 11   | 10   | 12   | 1.85E-7 | > 1.00E-4 | > 1.00E-4 |      |
| SR                                | 0.561 | 1.942 | 1.634 | 1.082                  | 0.646 | 0.626 | 0.631 | 78   | 38             | 35   | 19   | 20   | 4.93E-8 | > 1.00E-4 | > 1.00E-4 |      |
| <b>Non-Small Cell Lung Cancer</b> |       |       |       |                        |       |       |       |      |                |      |      |      |         |           |           |      |
| A549/ATCC                         | 0.350 | 1.244 | 1.189 | 0.705                  | 0.412 | 0.391 | 0.388 | 94   | 40             | 7    | 5    | 4    | 6.45E-8 | > 1.00E-4 | > 1.00E-4 |      |
| ERVK                              | 0.577 | 1.912 | 1.732 | 1.534                  | 1.239 | 1.162 | 1.256 | 93   | 75             | 50   | 43   | 51   | 1.37E-7 | > 1.00E-4 | > 1.00E-4 |      |
| HOP-62                            | 0.438 | 1.265 | 1.233 | 0.769                  | 0.702 | 0.613 | 0.586 | 97   | 40             | 32   | 21   | 18   | 6.78E-8 | > 1.00E-4 | > 1.00E-4 |      |
| NCI-H226                          | 0.848 | 1.913 | 1.858 | 1.327                  | 0.984 | 0.696 | 0.704 | 95   | 45             | 13   | -18  | -17  | 7.32E-8 | 2.61E-6   | > 1.00E-4 |      |
| NCI-H23                           | 0.593 | 1.865 | 1.816 | 1.218                  | 0.875 | 0.719 | 0.720 | 96   | 49             | 22   | 10   | 10   | 9.59E-8 | > 1.00E-4 | > 1.00E-4 |      |
| NCI-H322M                         | 0.644 | 1.301 | 1.252 | 1.047                  | 0.881 | 0.697 | 0.711 | 93   | 61             | 36   | 8    | 10   | 2.91E-7 | > 1.00E-4 | > 1.00E-4 |      |
| NCI-H460                          | 0.221 | 1.815 | 1.813 | 0.466                  | 0.296 | 0.182 | 0.155 | 100  | 15             | 5    | -18  | -30  | 3.89E-8 | 1.62E-6   | > 1.00E-4 |      |
| NCI-H522                          | 0.745 | 1.426 | 1.287 | 0.603                  | 0.548 | 0.388 | 0.475 | 79   | -19            | -27  | -48  | -36  | 1.99E-8 | 6.40E-8   | > 1.00E-4 |      |
| <b>Colon Cancer</b>               |       |       |       |                        |       |       |       |      |                |      |      |      |         |           |           |      |
| COLO 205                          | 0.253 | 1.062 | 1.084 | 0.539                  | 0.277 | 0.118 | 0.082 | 103  | 35             | 3    | -53  | -58  | 5.06E-8 | 1.13E-6   | 8.72E-6   |      |
| HCC-2998                          | 0.598 | 1.916 | 1.781 | 1.301                  | 0.614 | 0.673 | 0.637 | 97   | 58             | 1    | 6    | 3    | 1.37E-7 | > 1.00E-4 | > 1.00E-4 |      |
| HCT-116                           | 0.187 | 1.089 | 1.117 | 0.422                  | 0.266 | 0.146 | 0.138 | 103  | 26             | 9    | -22  | -26  | 4.89E-8 | 1.92E-6   | > 1.00E-4 |      |
| HCT-15                            | 0.332 | 2.325 | 2.186 | 1.192                  | 0.572 | 0.630 | 0.448 | 93   | 43             | 12   | 10   | 6    | 7.28E-8 | > 1.00E-4 | > 1.00E-4 |      |
| HT29                              | 0.198 | 1.059 | 1.051 | 0.247                  | 0.169 | 0.100 | 0.117 | 99   | 6              | -15  | -50  | -41  | 3.35E-8 | 1.90E-7   | > 1.00E-4 |      |
| KM12                              | 0.337 | 1.483 | 1.426 | 0.557                  | 0.427 | 0.252 | 0.242 | 95   | 19             | 8    | -25  | -28  | 3.32E-8 | 1.73E-6   | > 1.00E-4 |      |
| SW-620                            | 0.215 | 1.249 | 1.174 | 0.390                  | 0.401 | 0.376 | 0.352 | 93   | 17             | 18   | 16   | 13   | 3.67E-8 | > 1.00E-4 | > 1.00E-4 |      |
| <b>CNS Cancer</b>                 |       |       |       |                        |       |       |       |      |                |      |      |      |         |           |           |      |
| SF-268                            | 0.449 | 1.341 | 1.294 | 0.793                  | 0.742 | 0.545 | 0.520 | 95   | 39             | 33   | 11   | 8    | 6.25E-8 | > 1.00E-4 | > 1.00E-4 |      |
| SF-295                            | 0.603 | 2.047 | 1.932 | 0.705                  | 0.604 | 0.824 | 0.915 | 92   | 7              | -    | 15   | 22   | 3.12E-8 | > 1.00E-4 | > 1.00E-4 |      |
| SF-539                            | 0.675 | 1.996 | 1.947 | 0.897                  | 0.639 | 0.695 | 0.670 | 96   | 17             | -5   | -12  | -1   | 3.82E-8 | 5.74E-7   | > 1.00E-4 |      |
| SNB-19                            | 0.412 | 1.395 | 1.347 | 0.860                  | 0.713 | 0.605 | 0.604 | 95   | 46             | 31   | 20   | 19   | 8.15E-8 | > 1.00E-4 | > 1.00E-4 |      |
| SNB-75                            | 0.815 | 1.401 | 1.251 | 0.843                  | 0.867 | 0.919 | 0.920 | 74   | 5              | 9    | 18   | 18   | 2.24E-8 | > 1.00E-4 | > 1.00E-4 |      |
| U251                              | 0.282 | 1.172 | 1.105 | 0.511                  | 0.351 | 0.332 | 0.333 | 92   | 26             | 8    | 6    | 6    | 4.32E-8 | > 1.00E-4 | > 1.00E-4 |      |
| <b>Melanoma</b>                   |       |       |       |                        |       |       |       |      |                |      |      |      |         |           |           |      |
| LOX IMVI                          | 0.345 | 1.960 | 1.911 | 1.010                  | 0.939 | 0.634 | 0.629 | 97   | 41             | 37   | 18   | 18   | 6.94E-8 | > 1.00E-4 | > 1.00E-4 |      |
| M14                               | 0.298 | 1.126 | 1.094 | 0.543                  | 0.318 | 0.285 | 0.339 | 96   | 30             | 2    | -4   | 5    | 4.93E-8 | > 1.00E-4 | > 1.00E-4 |      |
| MDA-MB-435                        | 0.419 | 1.758 | 1.652 | 0.323                  | 0.251 | 0.262 | 0.250 | 92   | -23            | -40  | -38  | -40  | 2.32E-8 | 6.31E-8   | > 1.00E-4 |      |
| SK-MEL-2                          | 0.956 | 1.592 | 1.524 | 0.851                  | 0.824 | 0.750 | 0.745 | 89   | -11            | -14  | -22  | -22  | 2.46E-8 | 7.76E-8   | > 1.00E-4 |      |
| SK-MEL-28                         | 0.522 | 1.411 | 1.378 | 0.982                  | 0.858 | 0.856 | 0.872 | 96   | 52             | 38   | 38   | 39   | 1.33E-7 | > 1.00E-4 | > 1.00E-4 |      |
| SK-MEL-5                          | 0.641 | 2.840 | 2.714 | 1.152                  | 1.065 | 0.356 | 0.377 | 94   | 23             | 19   | -44  | -41  | 4.20E-8 | 2.01E-6   | > 1.00E-4 |      |
| UACC-267                          | 0.643 | 1.124 | 1.088 | 0.721                  | 0.792 | 0.747 | 0.788 | 92   | 16             | 31   | 22   | 30   | 3.50E-8 | > 1.00E-4 | > 1.00E-4 |      |
| UACC-62                           | 0.616 | 2.352 | 2.191 | 0.995                  | 1.058 | 0.947 | 0.875 | 91   | 22             | 25   | 19   | 15   | 3.90E-8 | > 1.00E-4 | > 1.00E-4 |      |
| <b>Ovarian Cancer</b>             |       |       |       |                        |       |       |       |      |                |      |      |      |         |           |           |      |
| IGROV1                            | 0.445 | 1.236 | 1.241 | 0.844                  | 0.684 | 0.536 | 0.493 | 101  | 80             | 30   | 11   | 6    | 1.04E-7 | > 1.00E-4 | > 1.00E-4 |      |
| OVCAR-3                           | 0.445 | 1.255 | 1.250 | 0.334                  | 0.214 | 0.191 | 0.181 | 99   | -25            | -52  | -59  | -59  | 2.50E-8 | 6.30E-8   | 8.50E-7   |      |
| OVCAR-4                           | 0.707 | 1.942 | 1.885 | 1.307                  | 1.230 | 1.023 | 1.019 | 95   | 49             | 42   | 26   | 25   | 9.34E-8 | > 1.00E-4 | > 1.00E-4 |      |
| OVCAR-5                           | 0.444 | 1.139 | 1.093 | 0.909                  | 0.730 | 0.600 | 0.650 | 93   | 67             | 41   | 22   | 30   | 4.51E-7 | > 1.00E-4 | > 1.00E-4 |      |
| OVCAR-8                           | 0.426 | 1.504 | 1.528 | 0.999                  | 0.578 | 0.444 | 0.461 | 102  | 53             | 14   | 2    | 3    | 1.20E-7 | > 1.00E-4 | > 1.00E-4 |      |
| NCIADR-RES                        | 0.430 | 1.351 | 1.350 | 0.657                  | 0.282 | 0.281 | 0.335 | 100  | 25             | -35  | -35  | -22  | 4.50E-8 | 2.61E-7   | > 1.00E-4 |      |
| SK-OV-3                           | 0.744 | 1.670 | 1.633 | 1.127                  | 0.947 | 0.803 | 0.747 | 96   | 41             | 22   | 6    | 6    | 6.95E-8 | > 1.00E-4 | > 1.00E-4 |      |
| <b>Renal Cancer</b>               |       |       |       |                        |       |       |       |      |                |      |      |      |         |           |           |      |
| 786-O                             | 0.804 | 2.342 | 2.262 | 1.357                  | 1.178 | 0.792 | 0.772 | 95   | 36             | 24   | -1   | -4   | 5.77E-8 | 8.75E-6   | > 1.00E-4 |      |
| A498                              | 1.130 | 1.649 | 1.456 | 1.160                  | 0.973 | 0.865 | 0.865 | 63   | 6              | -14  | -23  | -23  | 1.67E-8 | 1.95E-7   | > 1.00E-4 |      |
| ACHN                              | 0.328 | 1.503 | 1.478 | 0.854                  | 0.773 | 0.564 | 0.562 | 98   | 45             | 38   | 20   | 20   | 7.96E-8 | > 1.00E-4 | > 1.00E-4 |      |
| CAKI-1                            | 0.701 | 2.017 | 1.908 | 1.031                  | 0.991 | 0.788 | 0.778 | 92   | 25             | 22   | 7    | 6    | 4.23E-8 | > 1.00E-4 | > 1.00E-4 |      |
| RXF 393                           | 0.597 | 1.281 | 1.212 | 0.730                  | 0.562 | 0.616 | 0.726 | 90   | 19             | -6   | 3    | 19   | 3.68E-8 | > 1.00E-4 | > 1.00E-4 |      |
| SN12C                             | 0.488 | 1.732 | 1.697 | 1.193                  | 1.000 | 0.739 | 0.675 | 97   | 57             | 42   | 21   | 16   | 3.02E-7 | > 1.00E-4 | > 1.00E-4 |      |
| TK-10                             | 0.559 | 1.062 | 1.004 | 0.816                  | 0.774 | 0.718 | 0.742 | 87   | 47             | 38   | 26   | 31   | 8.31E-8 | > 1.00E-4 | > 1.00E-4 |      |
| UO-31                             | 0.635 | 1.314 | 1.203 | 0.894                  | 0.919 | 0.784 | 0.759 | 84   | 38             | 42   | 22   | 18   | 5.49E-8 | > 1.00E-4 | > 1.00E-4 |      |
| <b>Prostate Cancer</b>            |       |       |       |                        |       |       |       |      |                |      |      |      |         |           |           |      |
| PC-3                              | 0.525 | 1.515 | 1.503 | 0.778                  | 0.696 | 0.601 | 0.623 | 99   | 26             | 17   | 8    | 10   | 4.64E-8 | > 1.00E-4 | > 1.00E-4 |      |
| DU-145                            | 0.338 | 1.201 | 1.159 | 0.653                  | 0.360 | 0.188 | 0.205 | 95   | 37             | 2    | -45  | -39  | 6.88E-8 | 1.13E-6   | > 1.00E-4 |      |
| <b>Breast Cancer</b>              |       |       |       |                        |       |       |       |      |                |      |      |      |         |           |           |      |
| MCF7                              | 0.414 | 2.011 | 1.856 | 0.668                  | 0.709 | 0.647 | 0.552 | 90   | 16             | 18   | 15   | 9    | 3.48E-8 | > 1.00E-4 | > 1.00E-4 |      |
| MDA-MB-231/ATCC                   | 0.581 | 1.171 | 1.173 | 0.027                  | 0.729 | 0.504 | 0.506 | 100  | 76             | 26   | -13  | -13  | 3.21E-7 | 4.51E-6   | > 1.00E-4 |      |
| HS 578T                           | 0.763 | 1.498 | 1.466 | 0.928                  | 0.780 | 0.814 | 0.751 | 96   | 22             | 2    | 7    | -2   | 4.20E-8 | 6.54E-5   | > 1.00E-4 |      |
| BT-549                            | 0.868 | 1.804 | 1.781 | 1.316                  | 1.265 | 0.832 | 0.719 | 97   | 48             | 42   | -4   | -17  | 9.03E-8 | 8.15E-6   | > 1.00E-4 |      |
| T-47D                             | 0.726 | 1.818 | 1.577 | 1.065                  | 1.239 | 1.240 | 1.200 | 95   | 36             | 58   | 58   | 53   | 1.52E-7 | > 1.00E-4 | > 1.00E-4 |      |
| MDA-MB-468                        | 0.564 | 1.175 | 1.117 | 0.524                  | 0.584 | 0.495 | 0.543 | 90   | 10             | 3    | -12  | -4   | 3.18E-8 | 1.61E-6   | > 1.00E-4 |      |

Figure 3SI. Five dose data for NSC756092.



| Panel/Cell Line                   | Time  | Zero  | Ctrl  | Log10 Concentration    |       |       |       |      | Percent Growth |      |      |      |         | GI50      | TGI       | LC50 |
|-----------------------------------|-------|-------|-------|------------------------|-------|-------|-------|------|----------------|------|------|------|---------|-----------|-----------|------|
|                                   |       |       |       | Mean Optical Densities |       |       |       |      |                |      |      |      |         |           |           |      |
|                                   |       |       |       | -8.3                   | -7.3  | -6.3  | -5.3  | -4.3 | -8.3           | -7.3 | -6.3 | -5.3 | -4.3    |           |           |      |
| <b>Leukemia</b>                   |       |       |       |                        |       |       |       |      |                |      |      |      |         |           |           |      |
| CORF-CBM                          | 0.544 | 1.876 | 1.891 | 1.831                  | 1.905 | 0.712 | 0.651 | 101  | 97             | 102  | 13   | 11   | 1.91E-6 | > 5.00E-5 | > 5.00E-5 |      |
| HL-60(TB)                         | 0.724 | 1.967 | 1.807 | 1.756                  | 1.920 | 0.497 | 0.408 | 87   | 83             | 96   | -31  | -44  | 1.15E-6 | 2.84E-6   | > 5.00E-5 |      |
| K-562                             | 0.310 | 1.796 | 1.703 | 1.597                  | 1.442 | 0.443 | 0.418 | 94   | 87             | 76   | 9    | 7    | 1.23E-6 | > 5.00E-5 | > 5.00E-5 |      |
| MOLT-4                            | 0.548 | 1.763 | 1.668 | 1.720                  | 1.642 | 1.077 | 0.744 | 92   | 96             | 90   | 44   | 15   | 3.63E-6 | > 5.00E-5 | > 5.00E-5 |      |
| RFM-8226                          | 0.758 | 2.358 | 2.353 | 2.341                  | 2.393 | 0.862 | 0.867 | 100  | 99             | 102  | 8    | 7    | 1.78E-6 | > 5.00E-5 | > 5.00E-5 |      |
| SR                                | 0.561 | 1.900 | 1.683 | 1.721                  | 1.642 | 0.865 | 0.861 | 84   | 87             | 81   | 23   | 24   | 1.65E-6 | > 5.00E-5 | > 5.00E-5 |      |
| <b>Non-Small Cell Lung Cancer</b> |       |       |       |                        |       |       |       |      |                |      |      |      |         |           |           |      |
| A549(ATCC)                        | 0.350 | 1.099 | 1.061 | 1.083                  | 1.064 | 0.523 | 0.428 | 95   | 98             | 95   | 23   | 10   | 2.12E-6 | > 5.00E-5 | > 5.00E-5 |      |
| BEKX                              | 0.677 | 1.718 | 1.548 | 1.716                  | 1.615 | 1.000 | 1.064 | 93   | 100            | 90   | 31   | 37   | 2.39E-6 | > 5.00E-5 | > 5.00E-5 |      |
| HOP-62                            | 0.439 | 1.358 | 1.244 | 1.224                  | 1.243 | 0.526 | 0.504 | 98   | 96             | 98   | 23   | 20   | 2.18E-6 | > 5.00E-5 | > 5.00E-5 |      |
| NCI-H226                          | 0.848 | 1.923 | 1.862 | 1.642                  | 1.715 | 1.046 | 0.735 | 94   | 74             | 81   | 18   | -13  | 1.55E-6 | 1.90E-5   | > 5.00E-5 |      |
| NCI-H23                           | 0.593 | 1.851 | 1.827 | 1.777                  | 1.710 | 0.883 | 0.738 | 98   | 94             | 89   | 23   | 12   | 1.94E-6 | > 5.00E-5 | > 5.00E-5 |      |
| NCI-H322M                         | 0.644 | 1.297 | 1.252 | 1.247                  | 1.309 | 0.803 | 0.719 | 93   | 92             | 102  | 24   | 11   | 2.33E-6 | > 5.00E-5 | > 5.00E-5 |      |
| NCI-H460                          | 0.221 | 1.770 | 1.810 | 1.753                  | 1.803 | 0.335 | 0.197 | 103  | 99             | 102  | 7    | -11  | 1.77E-6 | 1.25E-5   | > 5.00E-5 |      |
| NCI-H522                          | 0.745 | 1.402 | 1.409 | 1.321                  | 1.161 | 0.644 | 0.495 | 101  | 88             | 63   | -14  | -34  | 7.46E-7 | 3.33E-6   | > 5.00E-5 |      |
| <b>Colon Cancer</b>               |       |       |       |                        |       |       |       |      |                |      |      |      |         |           |           |      |
| COLO 205                          | 0.353 | 0.983 | 1.033 | 1.053                  | 1.090 | 0.245 | 0.165 | 107  | 110            | 115  | -2   | -35  | 1.80E-6 | 4.89E-6   | > 5.00E-5 |      |
| HCC-T998                          | 0.598 | 1.769 | 1.754 | 1.744                  | 1.658 | 1.058 | 0.635 | 99   | 98             | 91   | 40   | 2    | 3.21E-6 | > 5.00E-5 | > 5.00E-5 |      |
| HCT-116                           | 0.187 | 1.073 | 1.110 | 1.014                  | 1.108 | 0.305 | 0.162 | 104  | 93             | 104  | 13   | -14  | 1.97E-6 | 1.56E-5   | > 5.00E-5 |      |
| HCT-15                            | 0.332 | 2.239 | 2.104 | 2.038                  | 1.987 | 0.796 | 0.467 | 93   | 89             | 87   | 24   | 7    | 1.94E-6 | > 5.00E-5 | > 5.00E-5 |      |
| HT29                              | 0.198 | 0.961 | 1.034 | 0.977                  | 1.033 | 0.208 | 0.157 | 110  | 102            | 109  | 1    | -21  | 1.77E-6 | 5.73E-6   | > 5.00E-5 |      |
| KM12                              | 0.337 | 1.488 | 1.492 | 1.432                  | 1.286 | 0.496 | 0.262 | 100  | 95             | 82   | 14   | -22  | 1.48E-6 | 1.20E-5   | > 5.00E-5 |      |
| SW-620                            | 0.215 | 1.188 | 1.179 | 1.131                  | 1.084 | 0.334 | 0.321 | 99   | 94             | 90   | 12   | 11   | 1.64E-6 | > 5.00E-5 | > 5.00E-5 |      |
| <b>CNS Cancer</b>                 |       |       |       |                        |       |       |       |      |                |      |      |      |         |           |           |      |
| SF-268                            | 0.449 | 1.339 | 1.309 | 1.280                  | 1.276 | 0.748 | 0.494 | 97   | 93             | 93   | 34   | 5    | 2.64E-6 | > 5.00E-5 | > 5.00E-5 |      |
| SF-295                            | 0.603 | 1.766 | 1.702 | 1.716                  | 1.482 | 0.441 | 0.466 | 94   | 96             | 76   | -27  | -23  | 8.88E-7 | 2.73E-6   | > 5.00E-5 |      |
| SF-539                            | 0.675 | 2.092 | 1.963 | 1.993                  | 1.995 | 0.636 | 0.767 | 91   | 93             | 93   | 6    | 5    | 1.36E-6 | > 5.00E-5 | > 5.00E-5 |      |
| SNB-19                            | 0.412 | 1.392 | 1.352 | 1.317                  | 1.366 | 0.671 | 0.560 | 96   | 92             | 97   | 26   | 15   | 2.32E-6 | > 5.00E-5 | > 5.00E-5 |      |
| SNB-75                            | 0.815 | 1.414 | 1.261 | 1.269                  | 1.231 | 0.852 | 1.011 | 73   | 76             | 69   | 6    | 33   | 1.01E-6 | > 5.00E-5 | > 5.00E-5 |      |
| U251                              | 0.282 | 0.995 | 1.043 | 1.000                  | 1.007 | 0.348 | 0.309 | 107  | 101            | 102  | 9    | 4    | 1.81E-6 | > 5.00E-5 | > 5.00E-5 |      |
| <b>Melanoma</b>                   |       |       |       |                        |       |       |       |      |                |      |      |      |         |           |           |      |
| LOX IMVI                          | 0.345 | 2.018 | 1.923 | 1.945                  | 1.895 | 0.564 | 0.623 | 84   | 96             | 93   | 37   | 17   | 2.92E-6 | > 5.00E-5 | > 5.00E-5 |      |
| M14                               | 0.298 | 1.085 | 1.124 | 1.034                  | 1.031 | 0.289 | 0.265 | 105  | 93             | 93   | -3   | -11  | 1.40E-6 | 4.65E-6   | > 5.00E-5 |      |
| MDA-MB-435                        | 0.419 | 1.590 | 1.590 | 1.590                  | 1.590 | 0.202 | 0.242 | 99   | 97             | 42   | -52  | -42  | 3.52E-7 | 1.39E-6   | > 5.00E-5 |      |
| SK-MEL-2                          | 0.966 | 1.548 | 1.579 | 1.529                  | 1.571 | 0.933 | 0.764 | 105  | 97             | 104  | -2   | -20  | 1.61E-6 | 4.74E-6   | > 5.00E-5 |      |
| SK-MEL-28                         | 0.522 | 1.418 | 1.436 | 1.406                  | 1.276 | 0.882 | 0.893 | 102  | 99             | 84   | 40   | 41   | 2.98E-6 | > 5.00E-5 | > 5.00E-5 |      |
| SK-MEL-5                          | 0.641 | 2.838 | 2.716 | 2.552                  | 2.586 | 0.888 | 0.422 | 94   | 87             | 89   | 11   | -34  | 1.57E-6 | 8.83E-6   | > 5.00E-5 |      |
| UACC-257                          | 0.643 | 1.028 | 1.021 | 0.998                  | 0.966 | 0.738 | 0.728 | 98   | 92             | 84   | 25   | 22   | 1.87E-6 | > 5.00E-5 | > 5.00E-5 |      |
| UACC-62                           | 0.616 | 2.292 | 2.248 | 2.160                  | 1.946 | 1.028 | 0.771 | 97   | 92             | 79   | 25   | 9    | 1.72E-6 | > 5.00E-5 | > 5.00E-5 |      |
| <b>Ovarian Cancer</b>             |       |       |       |                        |       |       |       |      |                |      |      |      |         |           |           |      |
| IGROV1                            | 0.445 | 1.256 | 1.224 | 1.231                  | 1.199 | 0.689 | 0.516 | 96   | 97             | 93   | 30   | 9    | 2.41E-6 | > 5.00E-5 | > 5.00E-5 |      |
| OVCAR-3                           | 0.445 | 1.223 | 1.253 | 1.214                  | 1.288 | 0.232 | 0.139 | 104  | 99             | 108  | -48  | -69  | 1.18E-6 | 2.47E-6   | 6.33E-6   |      |
| OVCAR-4                           | 0.707 | 1.917 | 1.915 | 1.921                  | 1.883 | 1.225 | 1.051 | 100  | 100            | 97   | 43   | 28   | 3.69E-6 | > 5.00E-5 | > 5.00E-5 |      |
| OVCAR-5                           | 0.444 | 1.139 | 1.116 | 1.074                  | 1.036 | 0.757 | 0.691 | 97   | 91             | 85   | 45   | 36   | 3.76E-6 | > 5.00E-5 | > 5.00E-5 |      |
| OVCAR-8                           | 0.426 | 1.344 | 1.384 | 1.344                  | 1.354 | 0.583 | 0.461 | 104  | 100            | 101  | 17   | 4    | 2.03E-6 | > 5.00E-5 | > 5.00E-5 |      |
| NCIADR-RES                        | 0.430 | 1.337 | 1.373 | 1.330                  | 1.198 | 0.293 | 0.313 | 104  | 99             | 85   | -32  | -27  | 9.93E-7 | 2.66E-6   | > 5.00E-5 |      |
| SK-OV-3                           | 0.744 | 1.637 | 1.645 | 1.610                  | 1.653 | 0.866 | 0.807 | 101  | 97             | 102  | 12   | 7    | 1.90E-6 | > 5.00E-5 | > 5.00E-5 |      |
| <b>Renal Cancer</b>               |       |       |       |                        |       |       |       |      |                |      |      |      |         |           |           |      |
| 786-O                             | 0.804 | 2.345 | 2.251 | 2.262                  | 2.395 | 1.275 | 0.941 | 94   | 95             | 103  | 31   | 9    | 2.70E-6 | > 5.00E-5 | > 5.00E-5 |      |
| A498                              | 1.130 | 1.652 | 1.436 | 1.548                  | 1.495 | 0.924 | 0.806 | 55   | 80             | 70   | -18  | -29  | 8.41E-7 | 3.11E-6   | > 5.00E-5 |      |
| ACHN                              | 0.328 | 1.504 | 1.549 | 1.508                  | 1.450 | 0.842 | 0.574 | 104  | 100            | 95   | 44   | 21   | 3.78E-6 | > 5.00E-5 | > 5.00E-5 |      |
| CAKI-1                            | 0.701 | 1.974 | 1.993 | 1.844                  | 1.667 | 0.760 | 0.800 | 101  | 90             | 76   | 5    | 8    | 1.15E-6 | > 5.00E-5 | > 5.00E-5 |      |
| RFXP 393                          | 0.597 | 1.325 | 1.301 | 1.151                  | 1.058 | 0.548 | 0.709 | 97   | 75             | 67   | -8   | 15   | 8.48E-7 | > 5.00E-5 | > 5.00E-5 |      |
| SN12C                             | 0.468 | 1.668 | 1.598 | 1.525                  | 1.607 | 0.987 | 0.683 | 93   | 88             | 95   | 43   | 18   | 3.70E-6 | > 5.00E-5 | > 5.00E-5 |      |
| TK-10                             | 0.599 | 1.028 | 0.976 | 0.978                  | 1.034 | 0.682 | 0.729 | 88   | 88             | 101  | 19   | 30   | 2.11E-6 | > 5.00E-5 | > 5.00E-5 |      |
| UO-31                             | 0.635 | 1.296 | 1.213 | 1.170                  | 1.259 | 0.825 | 0.793 | 87   | 81             | 94   | 29   | 24   | 2.37E-6 | > 5.00E-5 | > 5.00E-5 |      |
| <b>Prostate Cancer</b>            |       |       |       |                        |       |       |       |      |                |      |      |      |         |           |           |      |
| PC-3                              | 0.525 | 1.499 | 1.471 | 1.436                  | 1.432 | 0.661 | 0.572 | 97   | 94             | 93   | 14   | 5    | 1.75E-6 | > 5.00E-5 | > 5.00E-5 |      |
| DU-145                            | 0.338 | 1.202 | 1.156 | 1.158                  | 1.240 | 0.374 | 0.176 | 95   | 95             | 104  | 4    | -48  | 1.74E-6 | 6.01E-6   | > 5.00E-5 |      |
| <b>Breast Cancer</b>              |       |       |       |                        |       |       |       |      |                |      |      |      |         |           |           |      |
| MCF7                              | 0.414 | 2.024 | 1.919 | 1.799                  | 1.851 | 0.743 | 0.638 | 93   | 86             | 89   | 20   | 14   | 1.86E-6 | > 5.00E-5 | > 5.00E-5 |      |
| MDA-MB-231(ATCC)                  | 0.581 | 1.184 | 1.218 | 1.185                  | 1.229 | 0.911 | 0.554 | 105  | 100            | 107  | 55   | -5   | 5.98E-6 | 4.17E-6   | > 5.00E-5 |      |
| HS 578T                           | 0.763 | 1.521 | 1.523 | 1.497                  | 1.443 | 0.763 | 0.757 | 100  | 97             | 90   | -    | -    | 1.39E-6 | 4.99E-6   | > 5.00E-5 |      |
| BT-549                            | 0.868 | 1.923 | 1.898 | 1.838                  | 1.934 | 1.340 | 0.870 | 96   | 92             | 101  | 45   | -    | 4.03E-6 | > 5.00E-5 | > 5.00E-5 |      |
| T-47D                             | 0.726 | 1.532 | 1.463 | 1.511                  | 1.511 | 0.981 | 1.179 | 91   | 97             | 110  | 32   | 56   | -       | > 5.00E-5 | > 5.00E-5 |      |
| MDA-MB-468                        | 0.564 | 1.176 | 1.124 | 0.997                  | 0.995 | 0.488 | 0.567 | 91   | 71             | 70   | -13  | -    | 8.76E-7 | > 5.00E-5 | > 5.00E-5 |      |

Figure 4SI. Five dose data for NSC756093.

| Panel/Cell Line                   | Time Zero | Log10 Concentration    |       |       |       |       |                |      |      |      |      |      |         |           | GI50      | TGI | LC50 |
|-----------------------------------|-----------|------------------------|-------|-------|-------|-------|----------------|------|------|------|------|------|---------|-----------|-----------|-----|------|
|                                   |           | Mean Optical Densities |       |       |       |       | Percent Growth |      |      |      |      |      |         |           |           |     |      |
|                                   |           | Ctrl                   | -8.0  | -7.0  | -6.0  | -5.0  | -4.0           | -8.0 | -7.0 | -6.0 | -5.0 | -4.0 |         |           |           |     |      |
| <b>Leukemia</b>                   |           |                        |       |       |       |       |                |      |      |      |      |      |         |           |           |     |      |
| OCRF-CBM                          | 0.544     | 1.918                  | 1.930 | 1.588 | 0.720 | 0.717 | 0.565          | 101  | 76   | 13   | 13   | 1    | 2.98E-7 | > 1.00E-4 | > 1.00E-4 |     |      |
| HL-60(TB)                         | 0.724     | 2.146                  | 2.019 | 1.398 | 0.512 | 0.547 | 0.458          | 91   | 47   | -29  | -25  | -37  | 8.72E-8 | 4.15E-7   | > 1.00E-4 |     |      |
| K-562                             | 0.310     | 1.681                  | 1.611 | 0.683 | 0.469 | 0.476 | 0.354          | 95   | 27   | 12   | 12   | 3    | 4.60E-6 | > 1.00E-4 | > 1.00E-4 |     |      |
| MOLT-4                            | 0.548     | 1.722                  | 1.725 | 1.729 | 0.881 | 0.884 | 0.523          | 100  | 101  | 28   | 29   | 6    | 5.02E-7 | > 1.00E-4 | > 1.00E-4 |     |      |
| RPMI-8226                         | 0.758     | 2.378                  | 2.332 | 1.969 | 0.960 | 0.976 | 0.519          | 97   | 76   | 12   | 13   | -32  | 2.96E-7 | 1.99E-5   | > 1.00E-4 |     |      |
| SR                                | 0.561     | 1.895                  | 1.823 | 1.174 | 1.033 | 0.969 | 0.503          | 95   | 46   | 35   | 31   | -10  | 8.26E-8 | 5.57E-5   | > 1.00E-4 |     |      |
| <b>Non-Small Cell Lung Cancer</b> |           |                        |       |       |       |       |                |      |      |      |      |      |         |           |           |     |      |
| AS49(ATCC)                        | 0.360     | 1.164                  | 1.110 | 0.777 | 0.384 | 0.408 | 0.290          | 93   | 52   | 4    | 7    | -17  | 1.13E-7 | 1.96E-5   | > 1.00E-4 |     |      |
| EKVX                              | 0.677     | 1.689                  | 1.652 | 1.357 | 1.143 | 1.137 | 0.804          | 96   | 67   | 46   | 45   | 13   | 6.50E-7 | > 1.00E-4 | > 1.00E-4 |     |      |
| HOP-62                            | 0.439     | 1.152                  | 1.227 | 0.839 | 0.522 | 0.604 | 0.410          | 105  | 53   | 24   | 22   | -7   | 1.26E-7 | 6.93E-5   | > 1.00E-4 |     |      |
| NCI-H225                          | 0.846     | 1.975                  | 1.693 | 1.457 | 0.860 | 0.771 | 0.647          | 82   | 59   | 3    | -9   | -24  | 1.46E-7 | 1.80E-5   | > 1.00E-4 |     |      |
| NCI-H23                           | 0.593     | 1.830                  | 1.811 | 1.254 | 0.916 | 0.876 | 0.678          | 96   | 53   | 26   | 23   | 7    | 1.34E-7 | > 1.00E-4 | > 1.00E-4 |     |      |
| NCI-H322M                         | 0.644     | 1.431                  | 1.398 | 1.239 | 0.939 | 0.930 | 0.784          | 96   | 76   | 37   | 36   | 18   | 4.68E-7 | > 1.00E-4 | > 1.00E-4 |     |      |
| NCI-H460                          | 0.221     | 1.592                  | 1.979 | 0.689 | 0.241 | 0.216 | 0.070          | 99   | 26   | 1    | -2   | -68  | 4.74E-6 | 2.15E-6   | 5.28E-5   |     |      |
| NCI-H522                          | 0.745     | 1.435                  | 1.328 | 0.687 | 0.550 | 0.513 | 0.336          | 84   | -6   | -26  | -31  | -55  | 2.36E-6 | 8.22E-6   | 6.22E-5   |     |      |
| <b>Colon Cancer</b>               |           |                        |       |       |       |       |                |      |      |      |      |      |         |           |           |     |      |
| COLO 205                          | 0.253     | 0.939                  | 1.016 | 0.604 | 0.184 | 0.093 | 0.091          | 111  | 51   | -27  | -63  | -64  | 1.04E-7 | 4.47E-7   | 4.23E-6   |     |      |
| HCO-2988                          | 0.598     | 1.749                  | 1.659 | 1.360 | 0.657 | 0.720 | 0.341          | 82   | 66   | 5    | 11   | -43  | 1.84E-7 | 1.57E-5   | > 1.00E-4 |     |      |
| HCT-116                           | 0.187     | 1.103                  | 1.055 | 0.446 | 0.190 | 0.139 | 0.095          | 95   | 28   | -3   | -26  | -49  | 4.71E-6 | 1.02E-6   | > 1.00E-4 |     |      |
| HCT-115                           | 0.332     | 2.189                  | 2.139 | 1.080 | 0.608 | 0.578 | 0.386          | 97   | 40   | 15   | 13   | 3    | 6.75E-6 | > 1.00E-4 | > 1.00E-4 |     |      |
| HT29                              | 0.198     | 0.952                  | 0.989 | 0.382 | 0.153 | 0.107 | 0.067          | 105  | 24   | -23  | -46  | -66  | 4.80E-8 | 3.27E-7   | 1.58E-5   |     |      |
| KM12                              | 0.337     | 1.460                  | 1.506 | 0.640 | 0.377 | 0.296 | 0.157          | 104  | 27   | 4    | -12  | -53  | 5.02E-6 | 1.67E-6   | 8.26E-5   |     |      |
| SW-620                            | 0.215     | 1.238                  | 1.175 | 0.474 | 0.404 | 0.410 | 0.340          | 94   | 25   | 18   | 19   | 12   | 4.36E-6 | > 1.00E-4 | > 1.00E-4 |     |      |
| <b>CNS Cancer</b>                 |           |                        |       |       |       |       |                |      |      |      |      |      |         |           |           |     |      |
| SF-295                            | 0.449     | 1.390                  | 1.349 | 0.880 | 0.743 | 0.604 | 0.305          | 95   | 46   | 31   | 15   | -32  | 8.22E-6 | 2.18E-5   | > 1.00E-4 |     |      |
| SF-295                            | 0.603     | 1.777                  | 1.707 | 0.607 | 0.490 | 0.559 | 0.549          | 94   | -19  | -7   | -9   |      | 2.95E-6 | 1.04E-7   | > 1.00E-4 |     |      |
| SF-539                            | 0.675     | 2.036                  | 1.953 | 1.115 | 0.670 | 0.666 | 0.547          | 94   | 32   | -1   | -1   | -19  | 5.16E-6 | 9.45E-7   | > 1.00E-4 |     |      |
| SNB-19                            | 0.412     | 1.410                  | 1.427 | 0.918 | 0.733 | 0.728 | 0.569          | 102  | 51   | 32   | 32   | 16   | 1.05E-7 | > 1.00E-4 | > 1.00E-4 |     |      |
| SNB-75                            | 0.815     | 1.415                  | 1.346 | 0.975 | 0.921 | 0.935 | 0.835          | 89   | 27   | 18   | 20   | 3    | 4.20E-6 | > 1.00E-4 | > 1.00E-4 |     |      |
| U251                              | 0.282     | 1.086                  | 1.040 | 0.533 | 0.329 | 0.329 | 0.227          | 94   | 31   | 6    | 6    | -20  | 5.03E-8 | 1.69E-5   | > 1.00E-4 |     |      |
| <b>Melanoma</b>                   |           |                        |       |       |       |       |                |      |      |      |      |      |         |           |           |     |      |
| LOX IMVI                          | 0.345     | 1.932                  | 1.856 | 1.030 | 0.757 | 0.714 | 0.143          | 95   | 43   | 26   | 23   | -59  | 7.39E-6 | 1.92E-5   | 7.93E-5   |     |      |
| M14                               | 0.298     | 1.063                  | 1.109 | 0.571 | 0.247 | 0.288 | 0.239          | 105  | 36   | -17  | -4   | -20  | 6.24E-6 | 4.71E-7   | > 1.00E-4 |     |      |
| MDA-MB-435                        | 0.419     | 1.599                  | 1.487 | 0.304 | 0.328 | 0.316 | 0.331          | 90   | -27  | -22  | -25  | -21  | 2.20E-6 | 5.85E-6   | > 1.00E-4 |     |      |
| SK-MEL-2                          | 0.956     | 1.596                  | 1.614 | 1.145 | 0.865 | 0.904 | 0.604          | 103  | 30   | 1    | -5   | -37  | 5.26E-6 | 1.61E-6   | > 1.00E-4 |     |      |
| SK-MEL-28                         | 0.522     | 1.411                  | 1.370 | 0.968 | 0.886 | 0.980 | 0.765          | 95   | 50   | 41   | 51   | 27   |         | > 1.00E-4 | > 1.00E-4 |     |      |
| SK-MEL-5                          | 0.641     | 2.728                  | 2.403 | 1.269 | 0.760 | 0.415 | 0.224          | 84   | 30   | 6    | -35  | -65  | 4.30E-6 | 1.38E-6   | 3.11E-5   |     |      |
| UACC-257                          | 0.643     | 1.090                  | 0.991 | 0.685 | 0.737 | 0.745 | 0.490          | 78   | 9    | 21   | 23   | -24  | 2.55E-6 | 3.07E-5   | > 1.00E-4 |     |      |
| UACC-62                           | 0.616     | 2.217                  | 2.177 | 0.999 | 0.969 | 0.981 | 0.532          | 97   | 24   | 22   | 23   | -14  | 4.42E-6 | 4.22E-5   | > 1.00E-4 |     |      |
| <b>Ovarian Cancer</b>             |           |                        |       |       |       |       |                |      |      |      |      |      |         |           |           |     |      |
| IGROV1                            | 0.445     | 1.236                  | 1.213 | 0.813 | 0.658 | 0.598 | 0.500          | 97   | 46   | 27   | 19   | 7    | 8.52E-6 | > 1.00E-4 | > 1.00E-4 |     |      |
| OVCAR-3                           | 0.445     | 1.269                  | 1.342 | 0.440 | 0.264 | 0.248 | 0.112          | 109  | -1   | -41  | -44  | -75  | 3.43E-6 | 9.74E-6   | 1.53E-5   |     |      |
| OVCAR-4                           | 0.707     | 1.906                  | 1.919 | 1.286 | 1.204 | 1.079 | 0.866          | 101  | 48   | 41   | 31   | 13   | 9.29E-6 | > 1.00E-4 | > 1.00E-4 |     |      |
| OVCAR-5                           | 0.444     | 1.138                  | 1.121 | 0.983 | 0.754 | 0.725 | 0.577          | 97   | 78   | 45   | 40   | 19   | 6.88E-7 | > 1.00E-4 | > 1.00E-4 |     |      |
| OVCAR-8                           | 0.426     | 1.356                  | 1.290 | 0.928 | 0.477 | 0.458 | 0.367          | 93   | 54   | 5    | 3    | -14  | 1.21E-7 | 1.58E-5   | > 1.00E-4 |     |      |
| NCIADR-R1ES                       | 0.430     | 1.290                  | 1.275 | 0.593 | 0.268 | 0.362 | 0.373          | 98   | 18   | -33  | -16  | -13  | 3.97E-6 | 2.23E-7   | > 1.00E-4 |     |      |
| SK-OV-3                           | 0.744     | 1.634                  | 1.689 | 1.246 | 0.823 | 0.813 | 0.627          | 104  | 56   | 9    | 8    | -16  | 1.36E-7 | 2.13E-5   | > 1.00E-4 |     |      |
| <b>Renal Cancer</b>               |           |                        |       |       |       |       |                |      |      |      |      |      |         |           |           |     |      |
| 786-O                             | 0.804     | 2.332                  | 2.449 | 1.693 | 1.161 | 0.989 | 0.587          | 108  | 58   | 23   | 12   | -27  | 1.72E-7 | 2.04E-5   | > 1.00E-4 |     |      |
| A498                              | 1.130     | 1.780                  | 1.566 | 1.197 | 1.043 | 1.034 | 0.860          | 67   | 10   | -8   | -9   | -24  | 1.99E-6 | 3.72E-7   | > 1.00E-4 |     |      |
| ACHN                              | 0.328     | 1.509                  | 1.505 | 0.908 | 0.716 | 0.622 | 0.394          | 100  | 49   | 33   | 25   | 6    | 9.61E-6 | > 1.00E-4 | > 1.00E-4 |     |      |
| CAKI-1                            | 0.701     | 1.940                  | 1.862 | 0.955 | 1.043 | 0.949 | 0.633          | 94   | 21   | 28   | 12   | -10  | 3.95E-6 | 3.56E-5   | > 1.00E-4 |     |      |
| RXF 393                           | 0.597     | 1.275                  | 1.118 | 0.851 | 0.615 | 0.711 | 0.580          | 77   | 37   | 3    | 17   | -3   | 4.81E-6 | 7.10E-5   | > 1.00E-4 |     |      |
| SN12C                             | 0.468     | 1.657                  | 1.675 | 1.382 | 0.869 | 0.776 | 0.453          | 102  | 77   | 34   | 26   | -3   | 4.19E-7 | 7.76E-5   | > 1.00E-4 |     |      |
| TK-10                             | 0.599     | 1.026                  | 1.007 | 0.847 | 0.766 | 0.791 | 0.588          | 95   | 58   | 39   | 45   | -2   | 2.64E-7 | 9.13E-5   | > 1.00E-4 |     |      |
| UO-31                             | 0.635     | 1.291                  | 1.223 | 0.910 | 0.524 | 0.682 | 0.597          | 90   | 42   | 44   | 38   | -6   | 6.78E-6 | 7.27E-5   | > 1.00E-4 |     |      |
| <b>Prostate Cancer</b>            |           |                        |       |       |       |       |                |      |      |      |      |      |         |           |           |     |      |
| PC-3                              | 0.525     | 1.493                  | 1.507 | 0.890 | 0.657 | 0.607 | 0.493          | 101  | 38   | 14   | 8    | -6   | 6.41E-6 | 3.77E-5   | > 1.00E-4 |     |      |
| DU-145                            | 0.338     | 1.198                  | 1.213 | 0.814 | 0.286 | 0.234 | 0.160          | 102  | 55   | -16  | -31  | -53  | 1.19E-7 | 6.04E-7   | 7.44E-5   |     |      |
| <b>Breast Cancer</b>              |           |                        |       |       |       |       |                |      |      |      |      |      |         |           |           |     |      |
| MCF7                              | 0.414     | 1.928                  | 1.829 | 0.718 | 0.676 | 0.709 | 0.444          | 93   | 20   | 17   | 19   | 2    | 3.91E-6 | > 1.00E-4 | > 1.00E-4 |     |      |
| MDA-MB-231(ATCC)                  | 0.581     | 1.268                  | 1.341 | 1.224 | 0.745 | 0.615 | 0.416          | 111  | 94   | 24   | 5    | -28  | 4.21E-7 | 1.40E-5   | > 1.00E-4 |     |      |
| HIS 578T                          | 0.763     | 1.648                  | 1.594 | 1.221 | 0.978 | 0.965 | 0.821          | 94   | 52   | 24   | 23   | 6    | 1.15E-7 | > 1.00E-4 | > 1.00E-4 |     |      |
| BT-549                            | 0.866     | 1.854                  | 1.848 | 1.582 | 1.200 | 1.073 | 0.624          | 99   | 72   | 34   | 21   | -28  | 2.79E-7 | 2.56E-5   | > 1.00E-4 |     |      |
| T-47D                             | 0.726     | 1.523                  | 1.512 | 1.148 | 1.156 | 1.332 | 0.834          | 99   | 53   | 64   | 76   | 14   | 2.61E-5 | > 1.00E-4 | > 1.00E-4 |     |      |
| MDA-MB-468                        | 0.564     | 1.156                  | 1.007 | 0.738 | 0.553 | 0.591 | 0.552          | 75   | 29   | -2   | 4    | -2   | 3.51E-6 |           | > 1.00E-4 |     |      |

Figure 5SI. Five dose data for NSC756095.

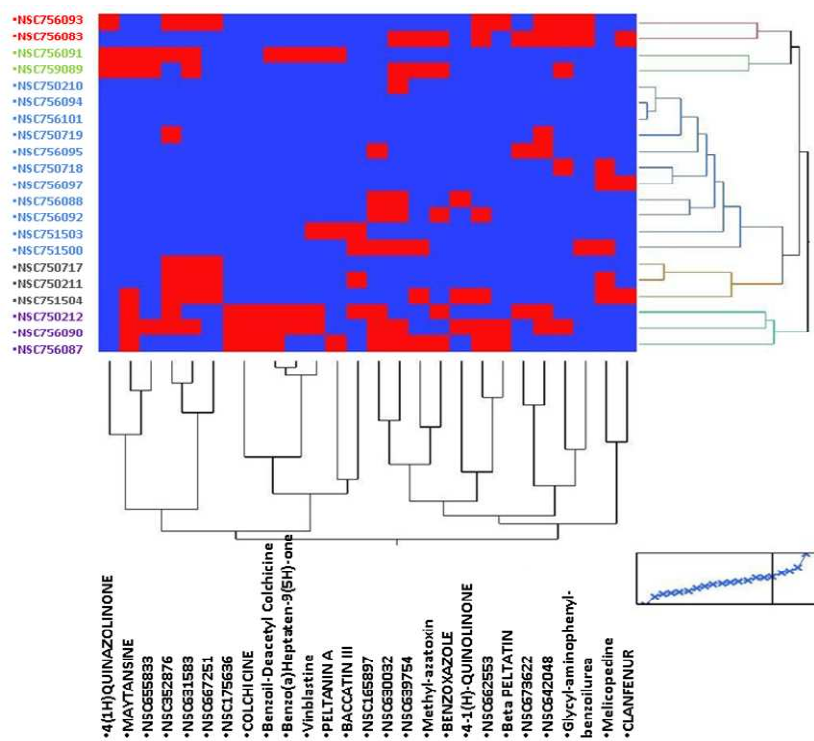

**Figure 6SI.** Heat-Map showing the results of two-way hierarchical clustering of the COMPARE analysis for the most active twenty-one 4-APTs with the reference mechanistic set (red = correlation; blu = no correlation). On the vertical axis, with different colors are represented the five different 4-APTs clusters. The first cluster (NSC756093 and NSC756083) show the highest divergence in terms of homology of mechanism as compared with the fifth cluster (NSC752012, NSC756090, NSC756087).



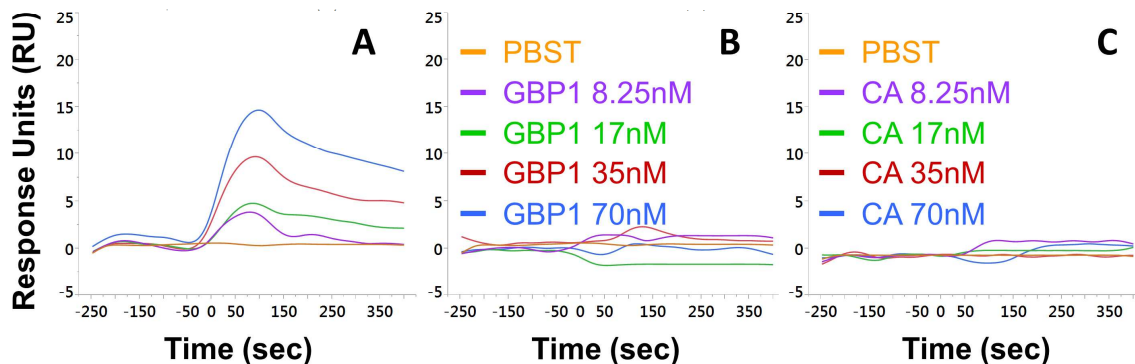

**Figure 7SI.** Representative biosensograms for controls of binding specificity for the interaction GBP1:PIM1. A: Positive dose-dependent control interaction between GBP1:PIM1. PIM1 was the analyte and [GBP1] were 8.25nM (purple line), 17nM (green line), 35nM (red line) and 70nM (blue line). Reference channel was kept in PBST (yellow line). B: Negative dose-dependent control. In the parallel line, CA was spotted and no signal was detectable in the same concentration range. These experiments demonstrate that GBP1 interact with PIM1 in a dose dependent manner, but not with CA. C: Negative dose dependent control of the interaction of CA with PIM1. CA was unable to interact with PIM1, used as a ligand in the same channel used for A. [CA] were 8.25nM (purple line), 17nM (green line), 35nM (red line) and 70nM (blue line). Reference channel was kept in PBST (yellow line).

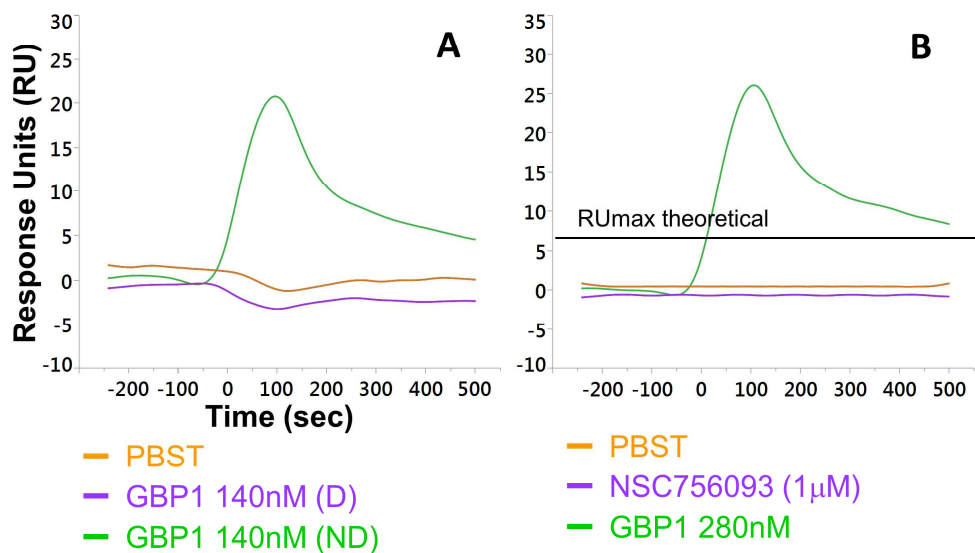

**Figure 8SI.** Representative biosensograms for the negative controls of binding of GBP1 and for the absence of binding of NSC756093 to PIM1 as ligand. A: GBP1 is capable to interact with PIM1 when the protein is purified in native conditions (green line) but not when the protein is heat-inactivated (purple line). Reference channel was kept in PBST (yellow line). B: NSC756093 is unable to bind to PIM1. PIM1 was used as ligand and was functional for its capability to bind GBP1 (green line). NSC756093 at a dose of 1  $\mu$ M was estimated to produce a maximum signal ( $RU_{max}$ ) in case of binding of 6.8 RU (continuous black line). We calculated the theoretical  $RU_{max}$  using the formula  $RU_{max} = MWA/MWL \times RL \times SM$ , where MWA is the molecular weight of the analyte PIM1, MWL is the molecular weight of NSC756093, RL is the immobilization level in RU of PIM1 in this experiment and SM is the molar stoichiometry (=1 $\mu$ M). No binding was noticed (purple line), thus suggesting no interaction of NSC756093 with PIM1. Reference channel was kept in PBST (yellow line).

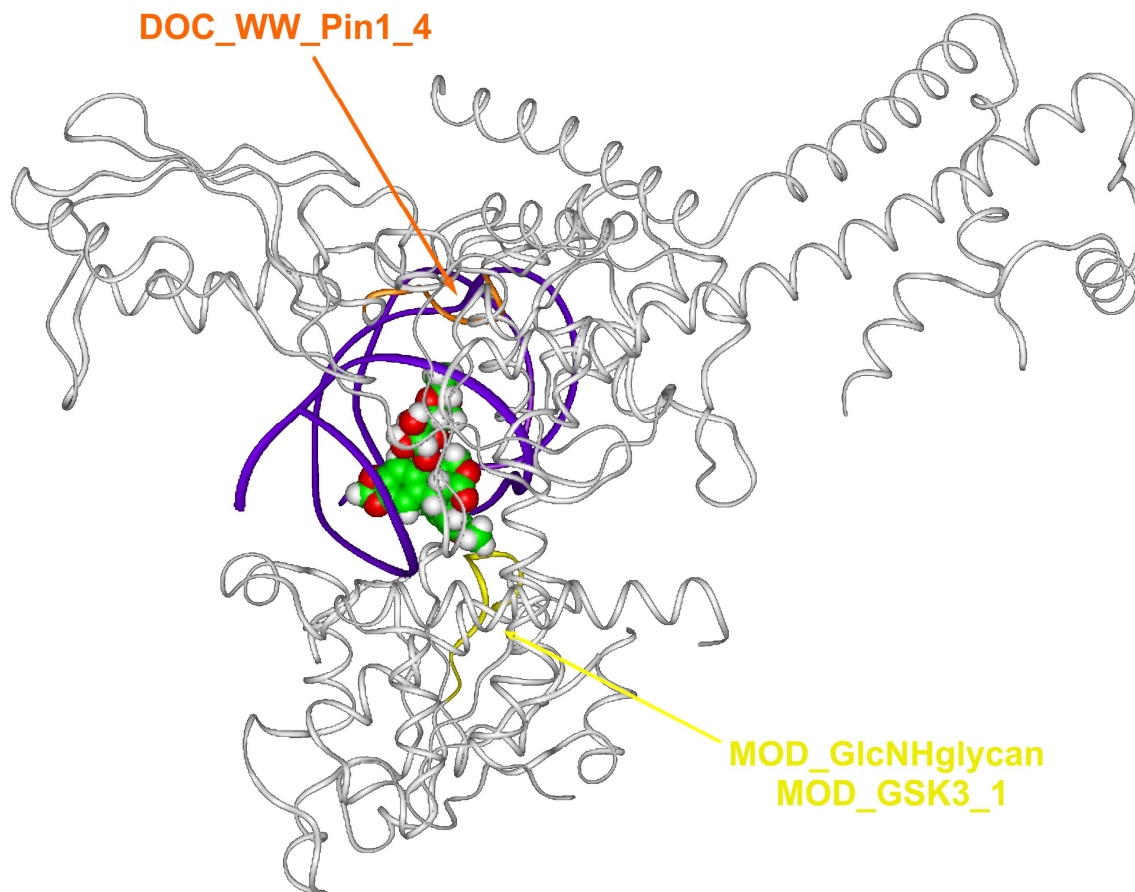

**Figure 9SI.** Overall view of the human TopoII $\beta$ /DNA complex stabilized by the anticancer drug etoposide (PDB ID: 3QX3). TopoII $\beta$  (white) and DNA (violet) are displayed as ribbons. Etoposide is displayed as CPK and colored by atom type (C = green, O = red, H = white). Protein motifs involved in binding site are displayed as ribbons and colored: DOC\_WW\_Pin1\_4 motif (orange); MOD\_GlcNHglycan and MOD\_GSK3\_1 motifs (yellow).

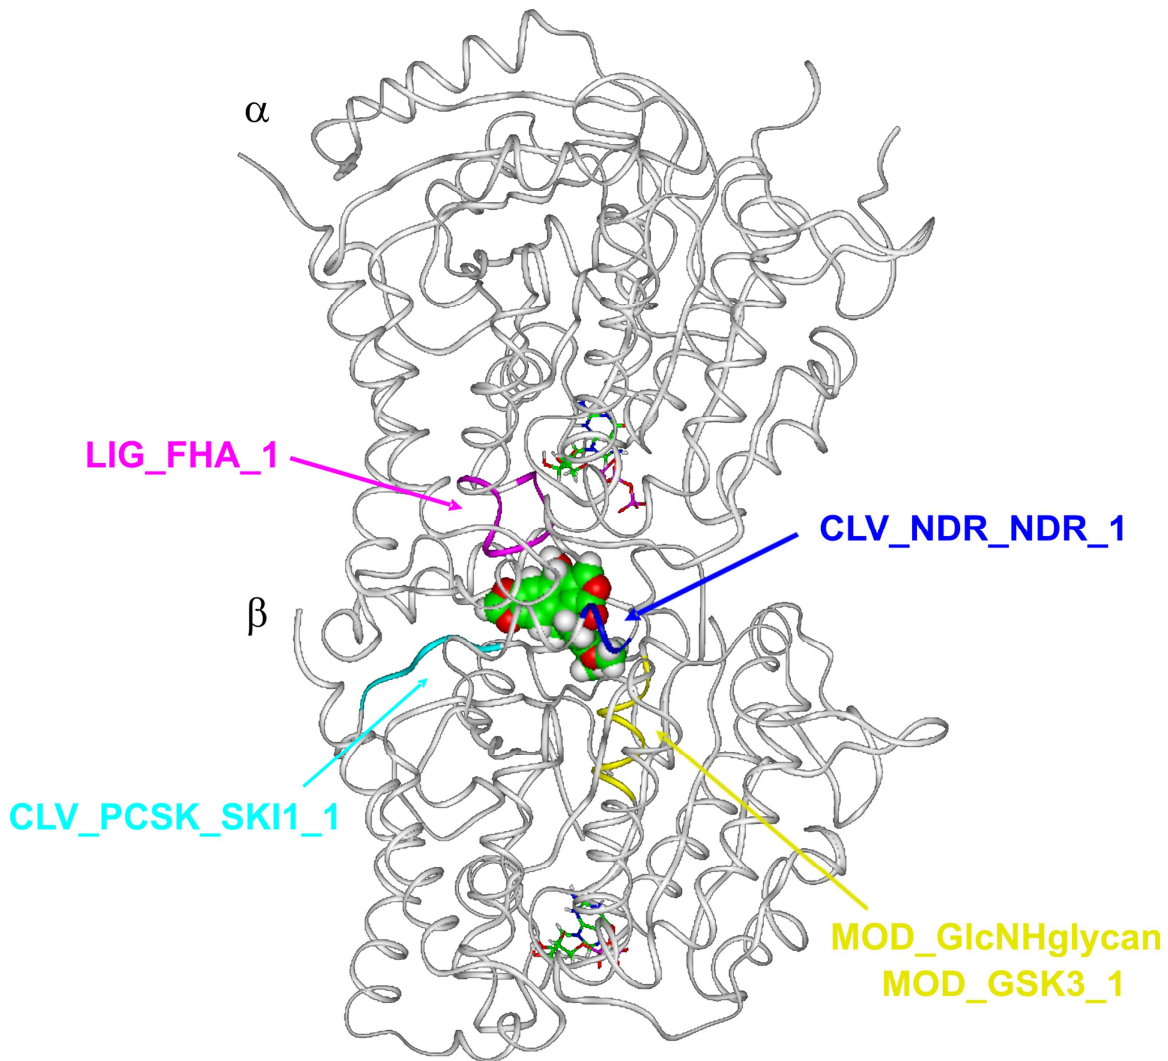

**Figure 10SI.** Overall view of X-ray structure of the human tubulin/podophyllotoxin complex (PDB ID: 1SA1).  $\alpha\beta$ -Tubulin (white) is displayed as ribbons. Podophyllotoxin is displayed as CPK and colored by atom type (C = green, O = red, H = white). Protein motifs involved in binding site are displayed as ribbons and colored: LIG\_FHA\_1 motif (magenta); CLV\_NDR\_NDR\_1 motif (blue); CLV\_PCSK\_SKI1\_1 motif (cyan); MOD\_GlcNHglycan and MOD\_GSK3\_1 motifs (yellow).

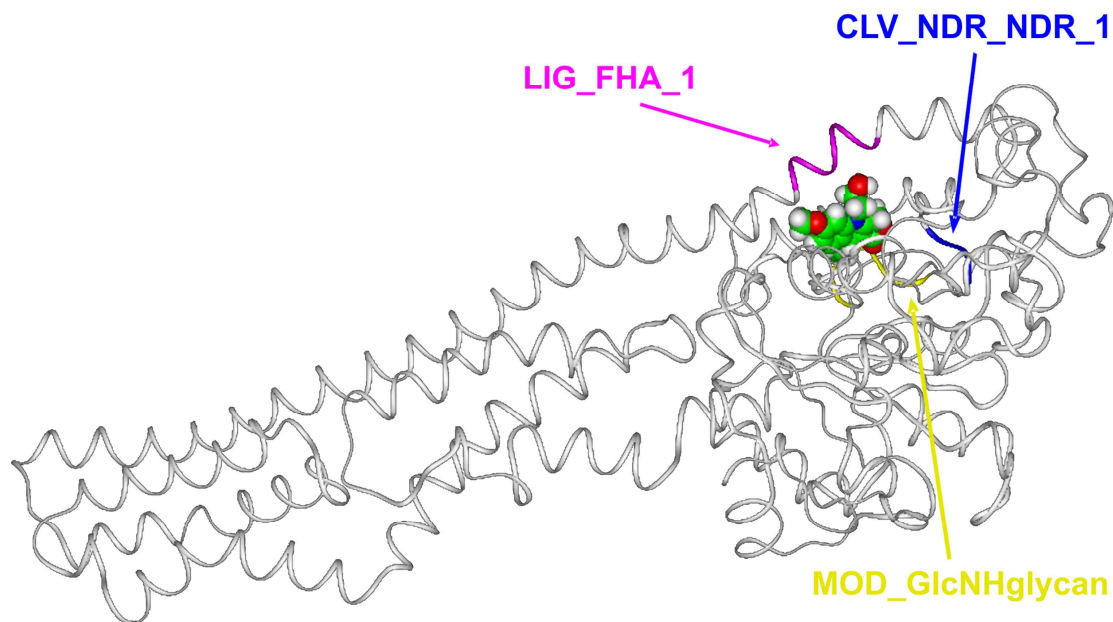

**Figure 11SI.** Overall view of NSC756093/GBP1 complex resulting from docking calculations. GBP1 (white) is displayed as ribbons. NSC756093 is displayed as CPK and colored by atom type (C = green, O = red, N = blue, H = white). Protein motifs involved in binding site are displayed as ribbons and colored: LIG\_FHA\_1 motif (magenta); CLV\_NDR\_NDR\_1 motif (blue); MOD\_GlcNHglycan motif (yellow).



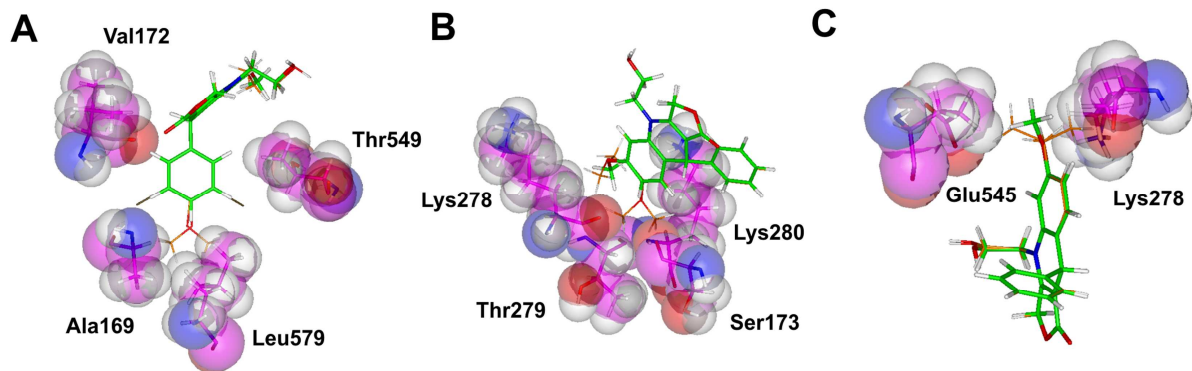

**Figure 12SI.** Superimposition of (A) NSC756095 and NSC756094, (B) NSC756100 and (C) NSC756108 PM7 conformers (carbons in orange) on the bioactive conformation of NSC756093 (carbons in green). Bioactive conformation of NSC756093 is displayed in sticks while conformers are displayed as lines. GBP1 amino acids (carbons in magenta) involved in steric clashes are labeled and displayed as CPK (transparency = 50 %). Heteroatoms are colored by atom type (O = red, N = blue, H = white).

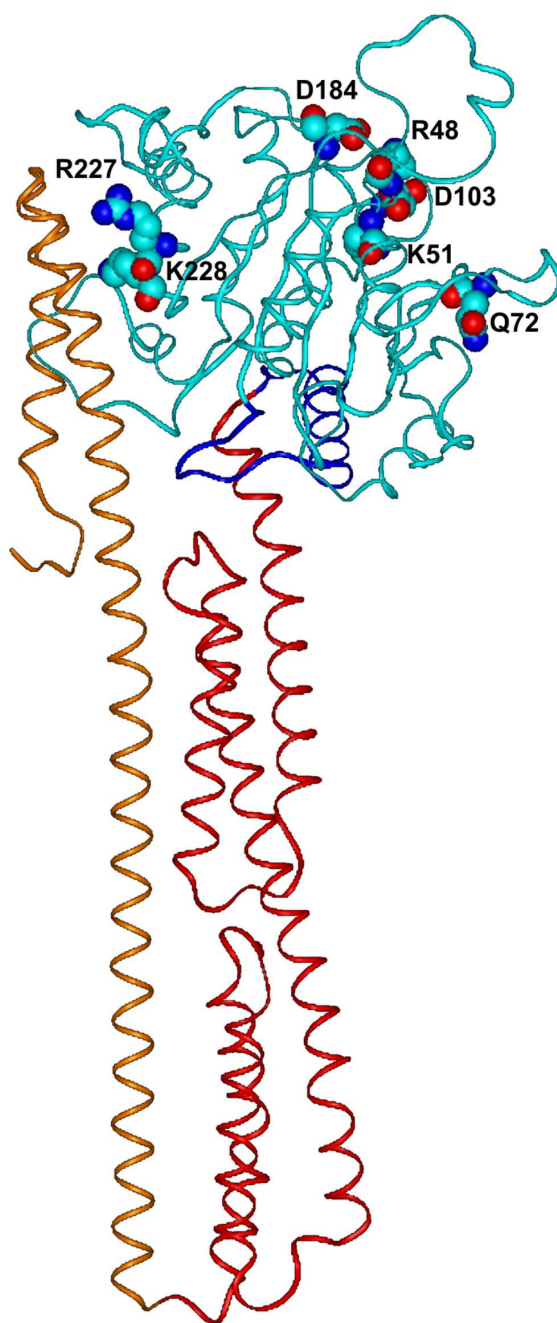

**Figure 13SI.** Mutated residues in GBP1 structure are displayed as CPK, colored by atom type (C = cyan, O = red, N = blue, H = white) and labeled. Hydrogens are omitted for clarity. GBP1 is displayed as ribbons, where the LG-domain is in cyan, the connecting region in blue, the helical domain in red and  $\alpha 12/\alpha 13$  in orange.

**Table 1SI.** Energy values of the NSC756093/GBP1 complexes obtained by docking studies.

| <b>Frame</b> | <b>Complex Energy (kcal/mol)</b> | <b>Set</b> | <b>Frame</b> | <b>Complex Energy (kcal/mol)</b> | <b>Set</b> |
|--------------|----------------------------------|------------|--------------|----------------------------------|------------|
| 1            | -4274.32                         | I          | 11           | -3685.40                         | II         |
| 2            | -4039.88                         | I          | 12           | -3683.72                         | II         |
| 3            | -3918.33                         | II         | 13           | -3659.74                         | III        |
| 4            | -3916.03                         | II         | 14           | -3644.31                         | II         |
| 5            | -3880.23                         | I          | 15           | -3614.31                         | II         |
| 6            | -3818.93                         | II         | 16           | -3608.95                         | II         |
| 7            | -3793.41                         | II         | 17           | -3598.23                         | II         |
| 8            | -3756.90                         | III        | 18           | -3413.74                         | II         |
| 9            | -3736.54                         | II         | 19           | -3411.68                         | II         |
| 10           | -3707.18                         | II         | 20           | -3192.69                         | III        |

**Table 2SI.** Protein functional motifs indentified by the ELM software in the binding sites of etoposide, podophyllotoxin, and NSC756093.

| Motif Name      | Functional site class             | Description                                                                                                                                                      | Consensus Sequence <sup>a</sup> |
|-----------------|-----------------------------------|------------------------------------------------------------------------------------------------------------------------------------------------------------------|---------------------------------|
| LIG_FHA_1       | FHA phosphopeptide ligands        | Phosphothreonine motif binding a subset of FHA domains that show a preference for a large aliphatic amino acid at the pT+3 position.                             | ..(T)..[ILV].                   |
| DOC_WW_Pin1_4   | WW domain ligands                 | The Class IV WW domain interaction motif is recognised primarily by the Pin1 phosphorylation-dependent prolyl isomerase.                                         | ...([ST])P.                     |
| CLV_NDR_NDR_1   | NDR cleavage site                 | N-Arg dibasic convertase (nardilysin) cleavage site                                                                                                              | (.RK) (RR[^KR])                 |
| CLV_PCSK_SKI1_1 | PCSK cleavage site                | Subtilisin/kexin isozyme-1 (SKI1) cleavage site                                                                                                                  | [RK].[AILMFV][LTKF].            |
| MOD_GlcNHglycan | Glycosaminoglycan attachment site | The glycosaminoglycan attachment site is an exposed serine which accepts transfer of xylose from UDP-xylose to the hydroxyl group by protein xylosyl transferase | [ED]{0,3}.(S)[GA].              |
| MOD_GSK3_1      | GSK3 phosphorylation site         | GSK3 phosphorylation recognition site                                                                                                                            | ..([ST])...[ST]                 |

<sup>a</sup> . any amino acid allowed; [...]amino acids listed are allowed; [^...]amino acids listed are not allowed; {*min*, *max*} *min* required, *max* allowed; | matches either expression it separates; (...)positions of specific interest.

# Ramachandran Plot 1DG3

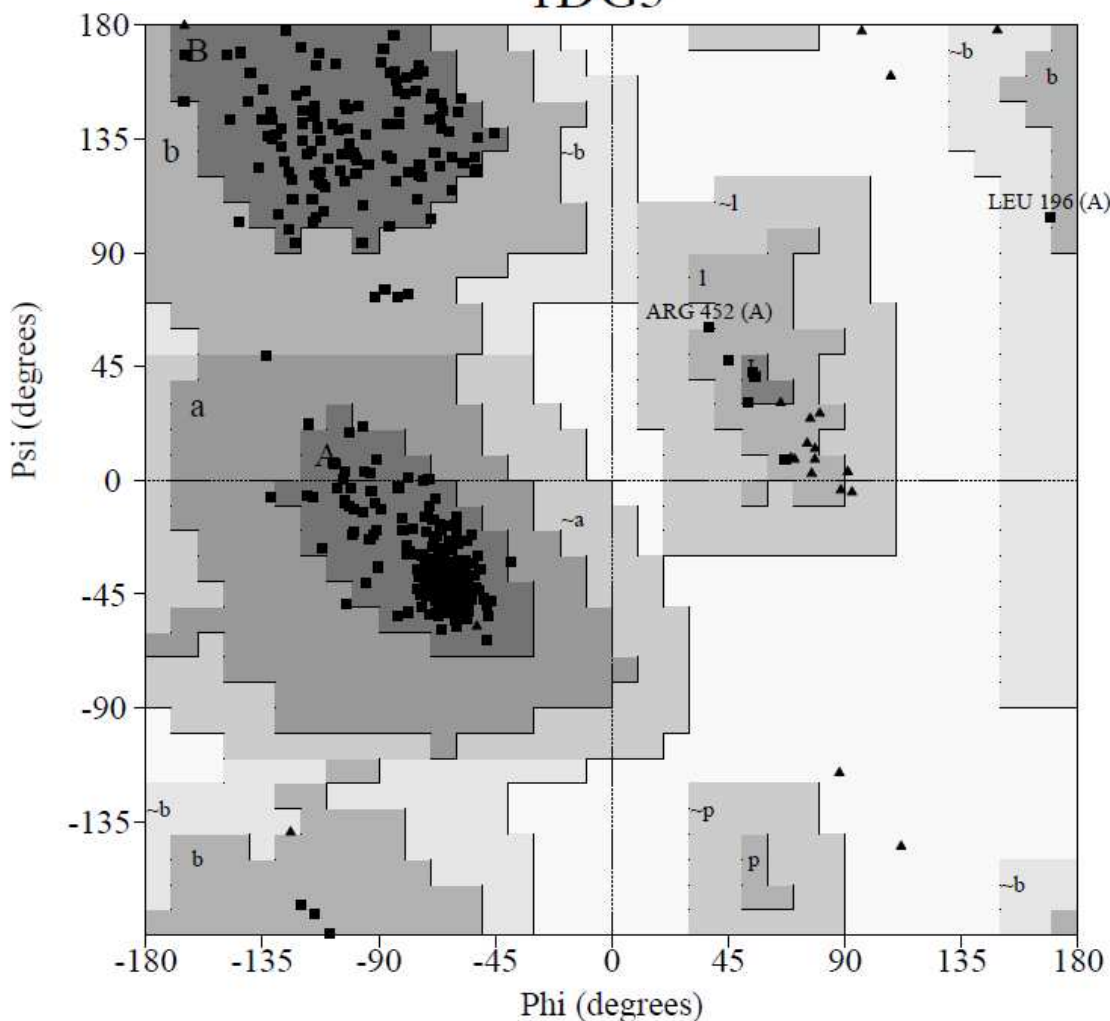

Plot statistics

|                                                      |     |        |
|------------------------------------------------------|-----|--------|
| Residues in most favoured regions [A,B,L]            | 470 | 96.3%  |
| Residues in additional allowed regions [a,b,l,p]     | 16  | 3.3%   |
| Residues in generously allowed regions [-a,-b,-l,-p] | 2   | .4%    |
| Residues in disallowed regions                       | 0   | .0%    |
| <hr/>                                                |     |        |
| Number of non-glycine and non-proline residues       | 488 | 100.0% |
| Number of end-residues (excl. Gly and Pro)           | 10  |        |
| Number of glycine residues (shown as triangles)      | 23  |        |
| Number of proline residues                           | 19  |        |
| <hr/>                                                |     |        |
| Total number of residues                             | 540 |        |

Based on an analysis of 118 structures of resolution of at least 2.0 Angstroms and R-factor no greater than 20%, a good quality model would be expected to have over 90% in the most favoured regions.



# Ramachandran Plot

## Docked\_Complex

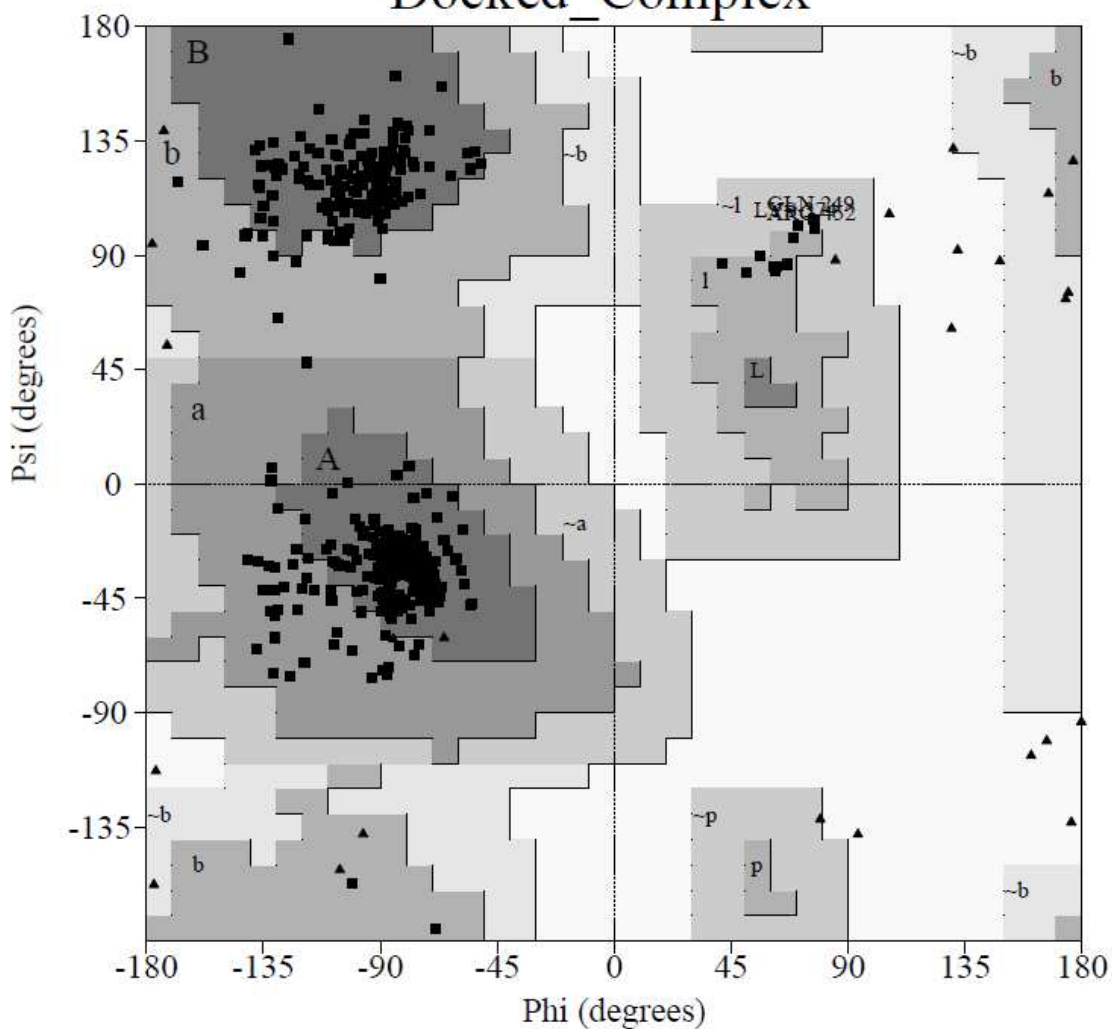

Plot statistics

|                                                      |     |        |
|------------------------------------------------------|-----|--------|
| Residues in most favoured regions [A,B,L]            | 477 | 87.7%  |
| Residues in additional allowed regions [a,b,l,p]     | 64  | 11.8%  |
| Residues in generously allowed regions [-a,-b,-l,-p] | 3   | .6%    |
| Residues in disallowed regions                       | 0   | .0%    |
| <hr/>                                                |     |        |
| Number of non-glycine and non-proline residues       | 544 | 100.0% |
| Number of end-residues (excl. Gly and Pro)           | 2   |        |
| Number of glycine residues (shown as triangles)      | 26  |        |
| Number of proline residues                           | 20  |        |
| <hr/>                                                |     |        |
| Total number of residues                             | 592 |        |

Based on an analysis of 118 structures of resolution of at least 2.0 Angstroms and R-factor no greater than 20%, a good quality model would be expected to have over 90% in the most favoured regions.

# Chi1-Chi2 plots

1DG3

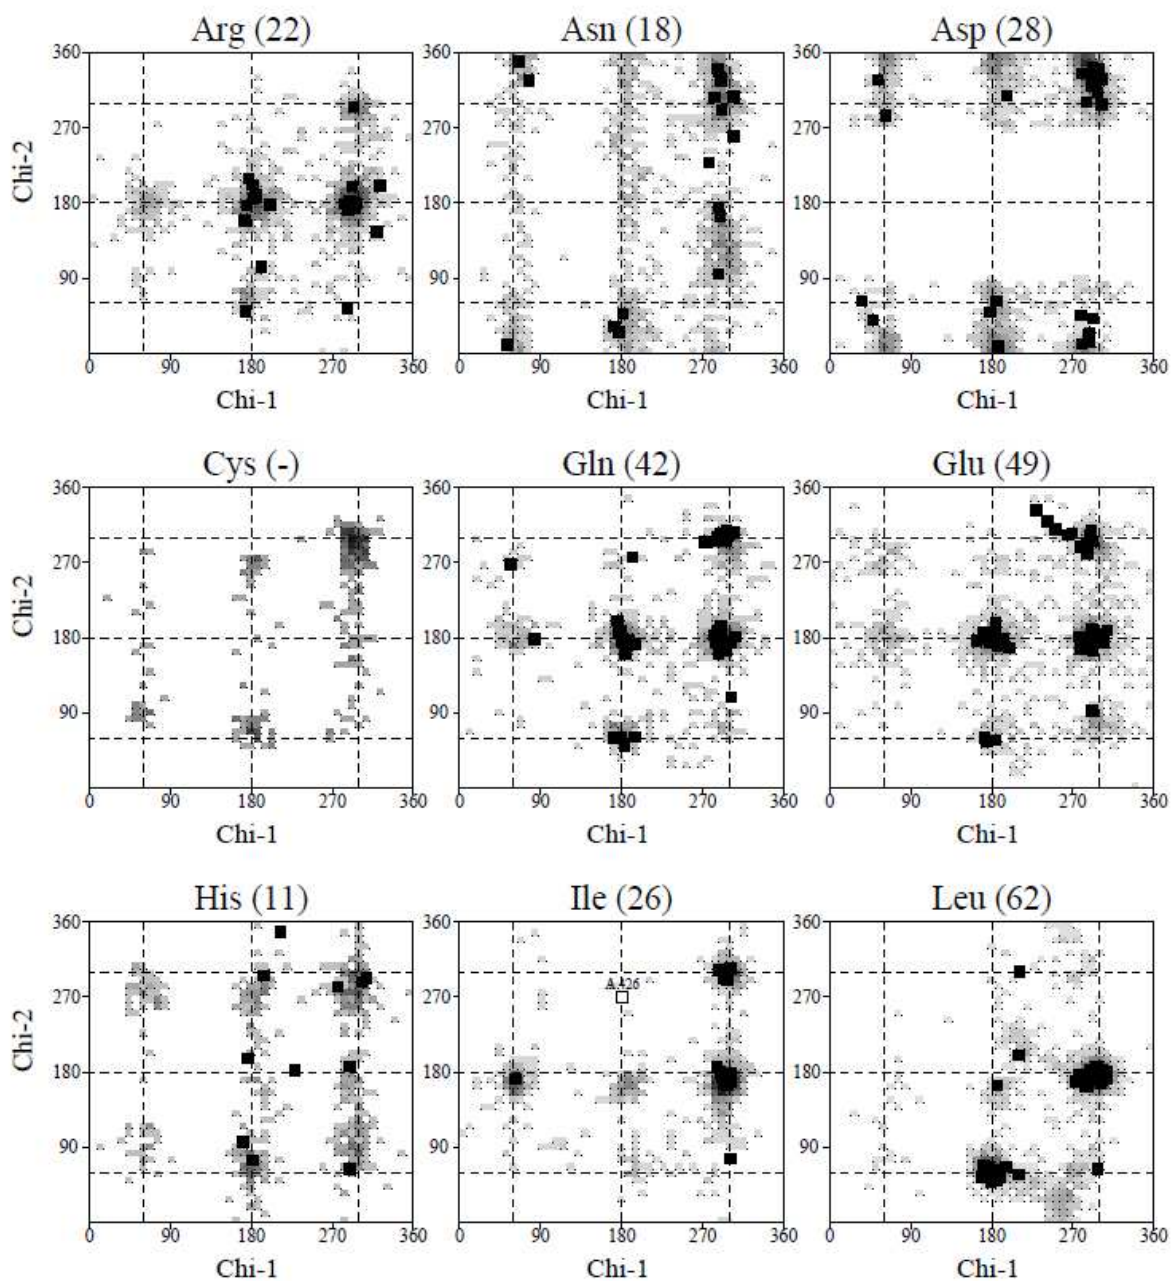

Numbers of residues are shown in brackets. Those in unfavourable conformations (score < -3.00) are labelled. Shading shows favourable conformations as obtained from an analysis of 163 structures at resolution 2.0Å or better.

# Chi1-Chi2 plots

## 1DG3

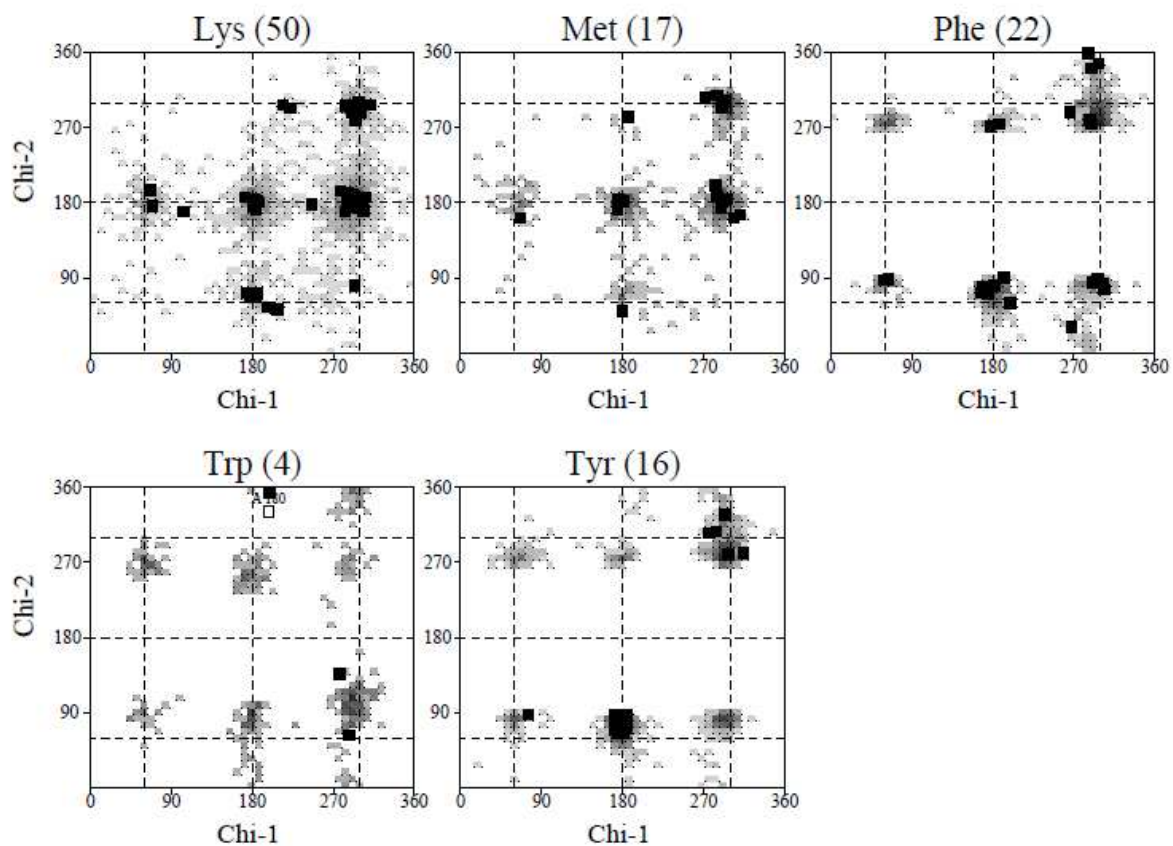

Numbers of residues are shown in brackets. Those in unfavourable conformations (score < -3.00) are labelled. Shading shows favourable conformations as obtained from an analysis of 163 structures at resolution 2.0Å or better.

# Chi1-Chi2 plots

## Docked\_Complex

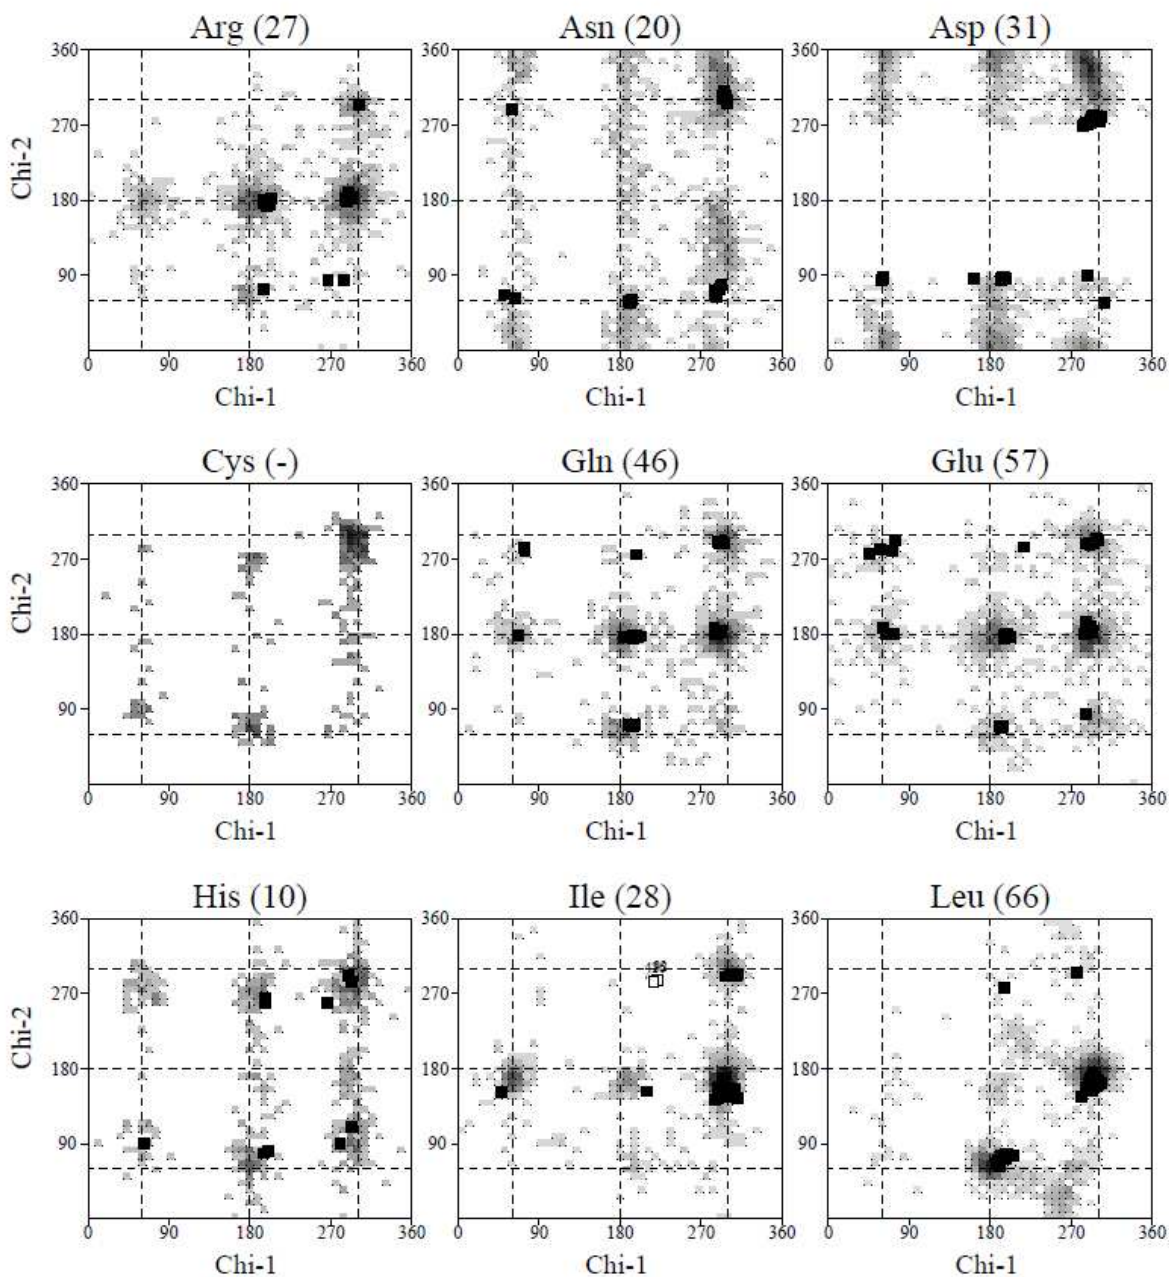

Numbers of residues are shown in brackets. Those in unfavourable conformations (score < -3.00) are labelled. Shading shows favourable conformations as obtained from an analysis of 163 structures at resolution 2.0Å or better.



# Chi1-Chi2 plots

## Docked\_Complex

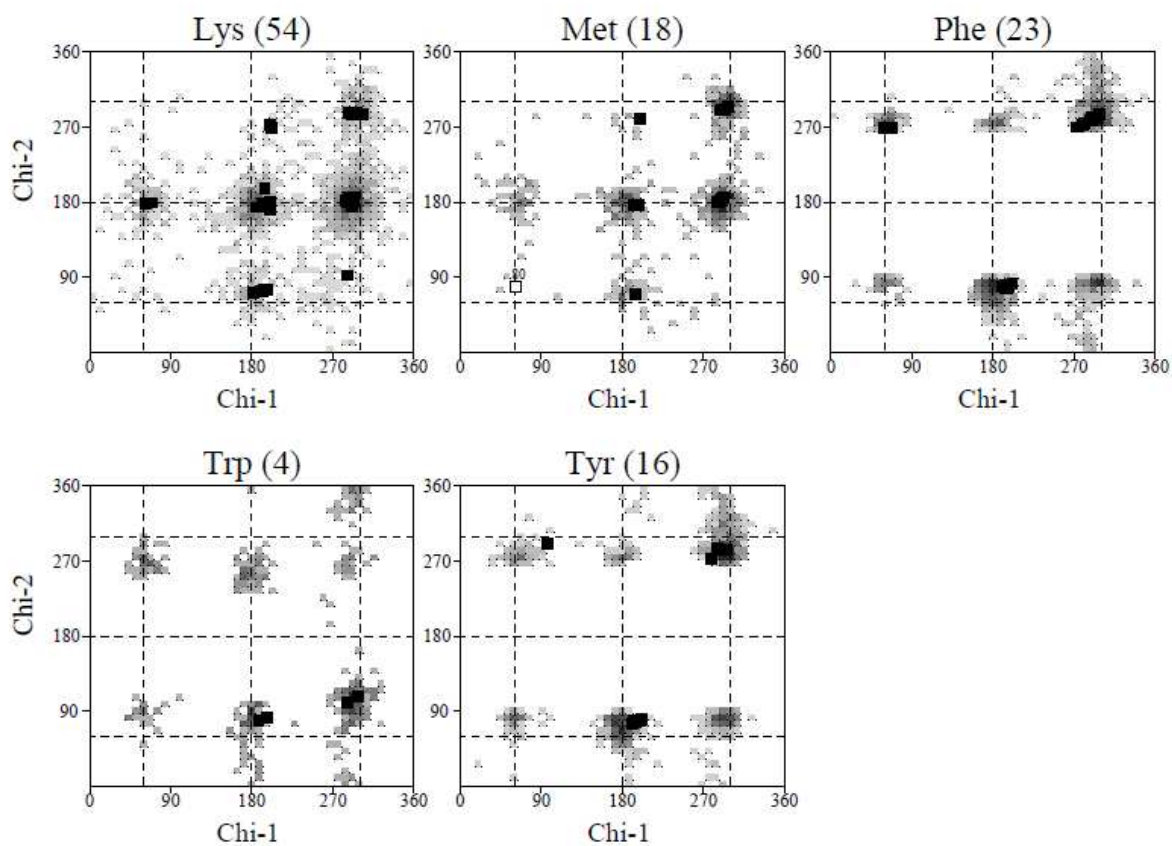

Numbers of residues are shown in brackets. Those in unfavourable conformations (score < -3.00) are labelled. Shading shows favourable conformations as obtained from an analysis of 163 structures at resolution 2.0Å or better.



# Main-chain parameters

## 1DG3

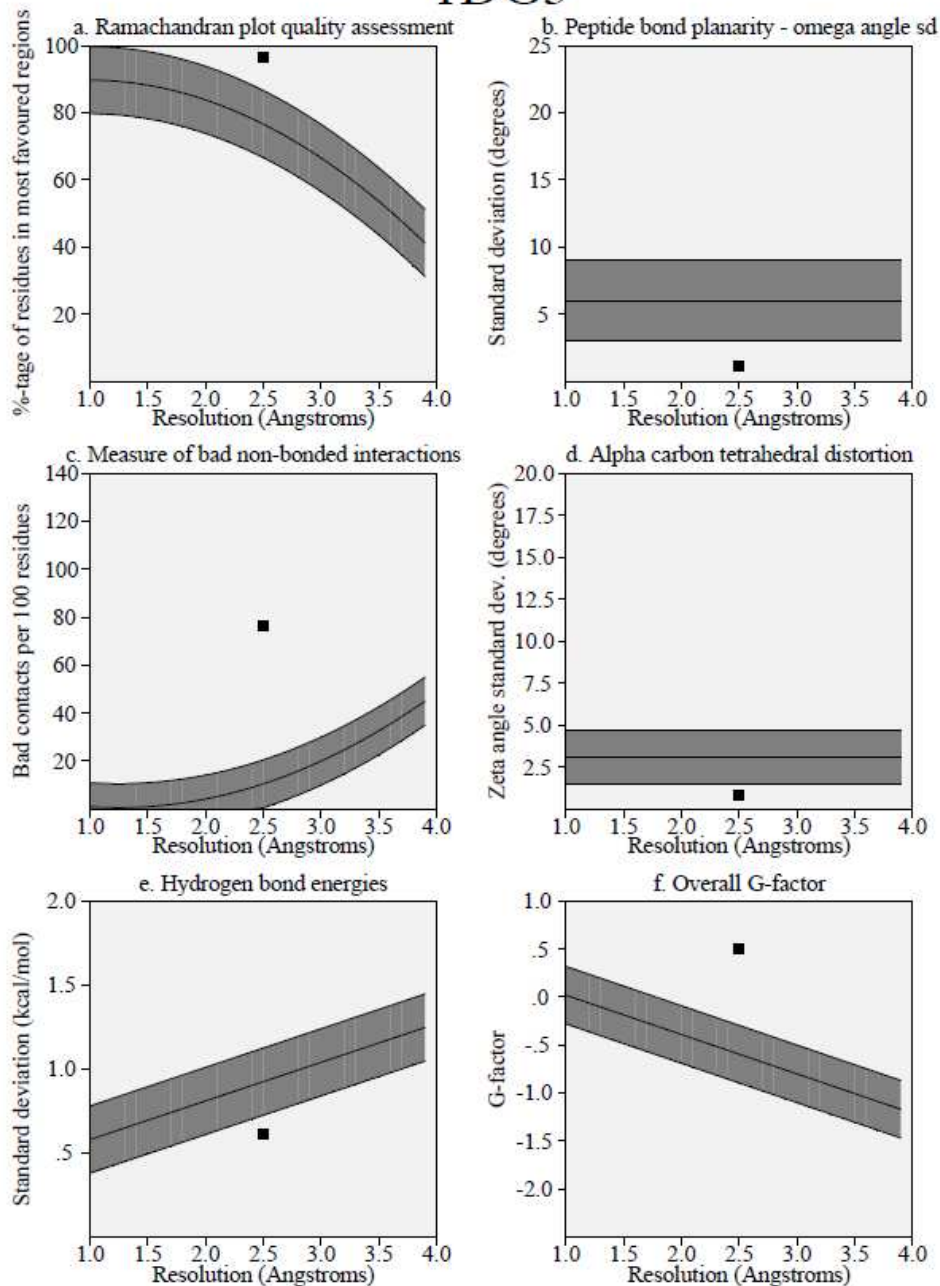

Plot statistics

| Stereochemical parameter       | No. of data pts | Parameter value | Comparison values |            | No. of band widths from mean |        |
|--------------------------------|-----------------|-----------------|-------------------|------------|------------------------------|--------|
|                                |                 |                 | Typical value     | Band width |                              |        |
| a. %-tage residues in A, B, L  | 488             | 96.3            | 76.6              | 10.0       | 2.0                          | BETTER |
| b. Omega angle st dev          | 534             | 1.2             | 6.0               | 3.0        | -1.6                         | BETTER |
| c. Bad contacts / 100 residues | 413             | 76.5            | 10.5              | 10.0       | 6.6                          | WORSE  |
| d. Zeta angle st dev           | 517             | .8              | 3.1               | 1.6        | -1.4                         | BETTER |
| e. H-bond energy st dev        | 402             | .6              | .9                | .2         | -1.6                         | BETTER |
| f. Overall G-factor            | 540             | .5              | -.6               | .3         | 3.6                          | BETTER |

# Main-chain parameters Docked Complex

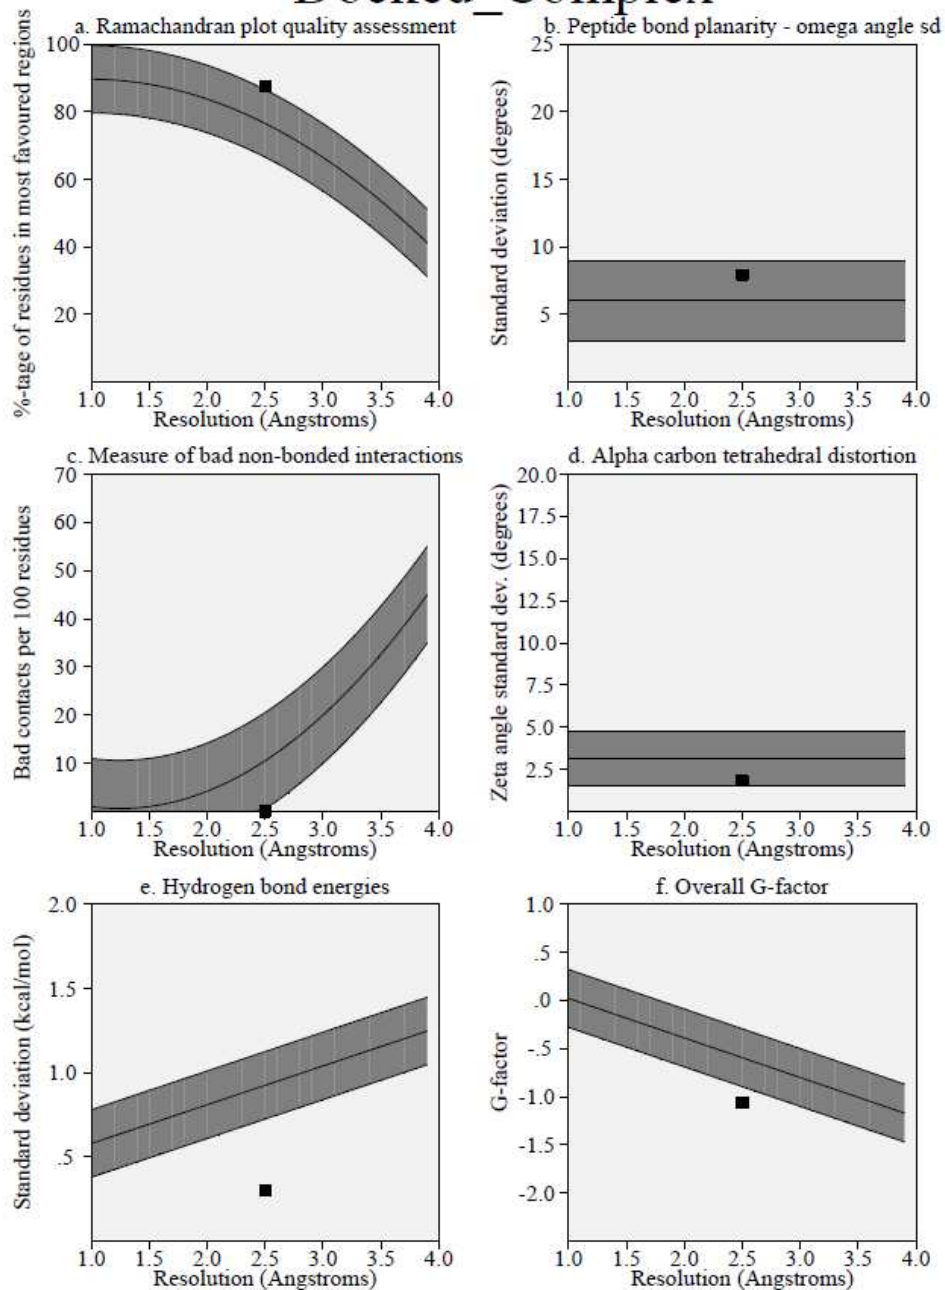

Plot statistics

| Stereochemical parameter       | No. of data pts | Parameter value | Comparison values |            | No. of band widths from mean |        |
|--------------------------------|-----------------|-----------------|-------------------|------------|------------------------------|--------|
|                                |                 |                 | Typical value     | Band width |                              |        |
| a. %-tage residues in A, B, L  | 544             | 87.7            | 76.6              | 10.0       | 1.1                          | BETTER |
| b. Omega angle st dev          | 590             | 7.9             | 6.0               | 3.0        | .6                           | Inside |
| c. Bad contacts / 100 residues | 0               | .0              | 10.5              | 10.0       | -1.1                         | BETTER |
| d. Zeta angle st dev           | 566             | 1.8             | 3.1               | 1.6        | -.8                          | Inside |
| e. H-bond energy st dev        | 311             | .3              | .9                | .2         | -3.1                         | BETTER |
| f. Overall G-factor            | 592             | -1.1            | -.6               | .3         | -1.6                         | WORSE  |

# Side-chain parameters

## 1DG3

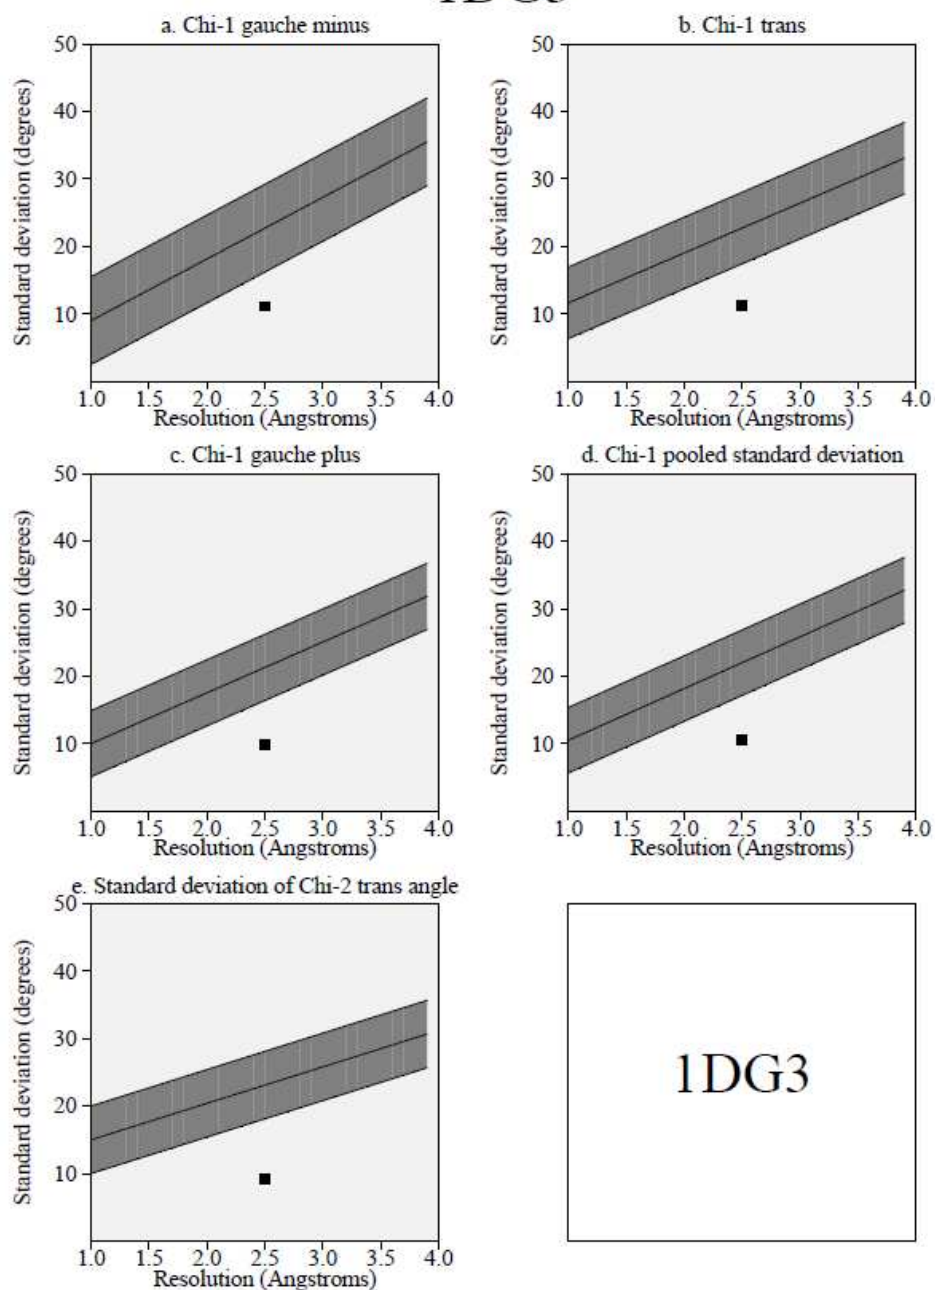

Plot statistics

| Stereochemical parameter     | No. of data pts | Parameter value | Comparison values |            | No. of band widths from mean |        |
|------------------------------|-----------------|-----------------|-------------------|------------|------------------------------|--------|
|                              |                 |                 | Typical value     | Band width |                              |        |
| a. Chi-1 gauche minus st dev | 44              | 11.1            | 22.7              | 6.5        | -1.8                         | BETTER |
| b. Chi-1 trans st dev        | 161             | 11.3            | 22.7              | 5.3        | -2.2                         | BETTER |
| c. Chi-1 gauche plus st dev  | 263             | 9.9             | 21.3              | 4.9        | -2.3                         | BETTER |
| d. Chi-1 pooled st dev       | 468             | 10.5            | 22.0              | 4.8        | -2.4                         | BETTER |
| e. Chi-2 trans st dev        | 178             | 9.1             | 23.1              | 5.0        | -2.8                         | BETTER |

# Side-chain parameters Docked\_Complex

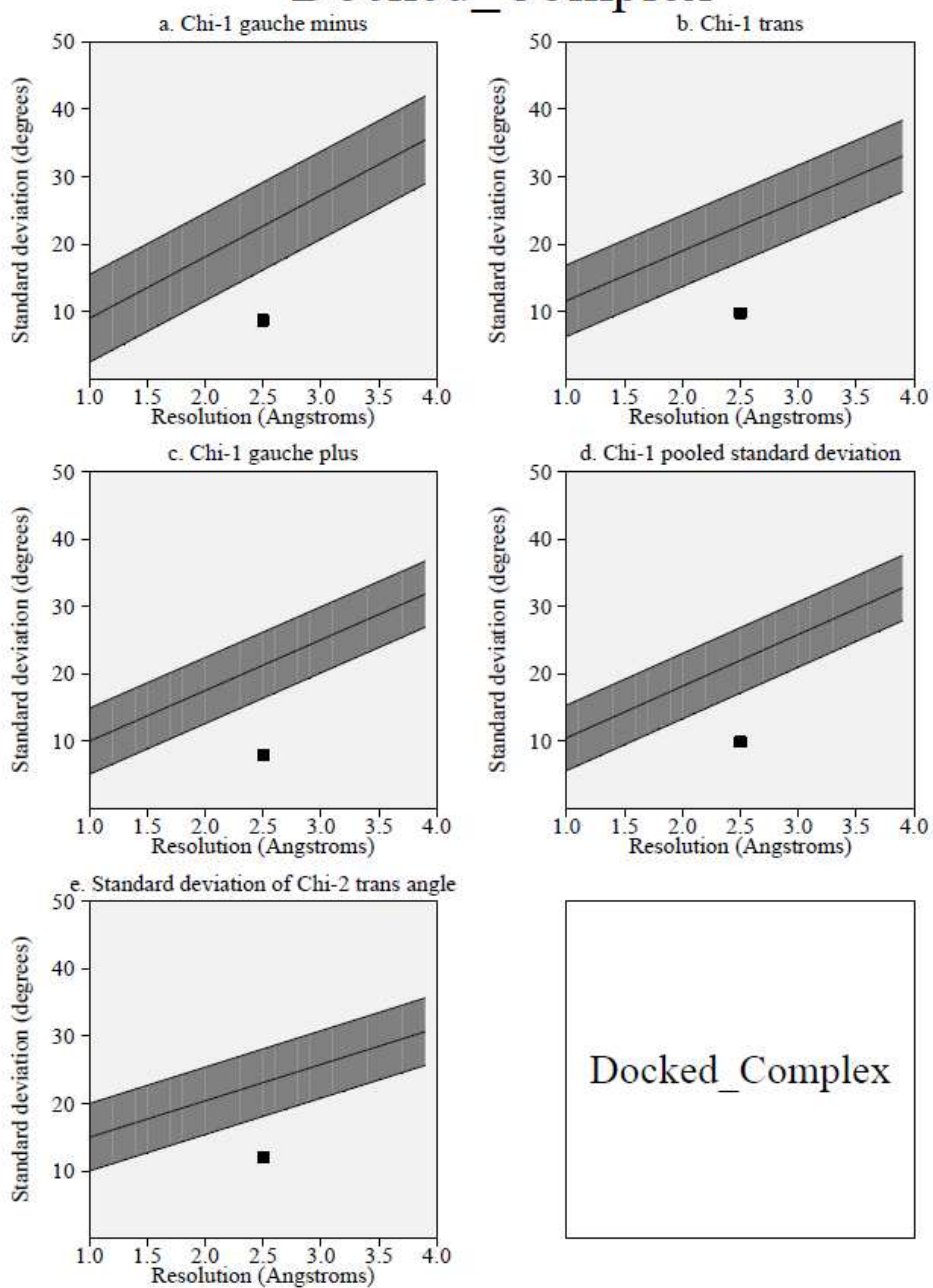

Plot statistics

| Stereochemical parameter     | No. of data pts | Parameter value | Comparison values |            | No. of band widths from mean |        |
|------------------------------|-----------------|-----------------|-------------------|------------|------------------------------|--------|
|                              |                 |                 | Typical value     | Band width |                              |        |
| a. Chi-1 gauche minus st dev | 57              | 8.7             | 22.7              | 6.5        | -2.1                         | BETTER |
| b. Chi-1 trans st dev        | 179             | 9.8             | 22.7              | 5.3        | -2.4                         | BETTER |
| c. Chi-1 gauche plus st dev  | 276             | 8.0             | 21.3              | 4.9        | -2.7                         | BETTER |
| d. Chi-1 pooled st dev       | 512             | 9.9             | 22.0              | 4.8        | -2.5                         | BETTER |
| e. Chi-2 trans st dev        | 200             | 12.0            | 23.1              | 5.0        | -2.2                         | BETTER |
